# Supplementary material for: Comparative cervical profiles of adult and under-18 front-row rugby players: implications for playing policy
Source: PubMed Central journal article supplement — BMJ Open. 2014 May 5;4(5):e004975. doi: 10.1136/bmjopen-2014-004975 (PMC4025467; doi:10.1136/bmjopen-2014-004975), 2014-05-05
Supplement: bmjopen-2014-004975.draft_revisions.pdf [file bmjopen-2014-004975.draft_revisions.pdf]

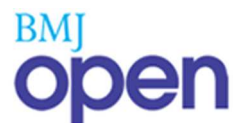

**Comparative cervical profiles of adult and under-18 front row rugby players: implications for playing policy.**

|                                 |                                                                                                                                                                                                                                                                                                                                   |
|---------------------------------|-----------------------------------------------------------------------------------------------------------------------------------------------------------------------------------------------------------------------------------------------------------------------------------------------------------------------------------|
| Journal:                        | <i>BMJ Open</i>                                                                                                                                                                                                                                                                                                                   |
| Manuscript ID:                  | bmjopen-2014-004975                                                                                                                                                                                                                                                                                                               |
| Article Type:                   | Research                                                                                                                                                                                                                                                                                                                          |
| Date Submitted by the Author:   | 31-Jan-2014                                                                                                                                                                                                                                                                                                                       |
| Complete List of Authors:       | Hamilton, David; University of Edinburgh, Orthopaedics<br>Gatherer, Don; Gatherer Limited,<br>Robson, James; Scottish Rugby Union,<br>Graham, Neil; Scottish Rugby Union,<br>Rennie, Nick; Scottish Rugby Union,<br>MacLean, James; Perth Royal Infirmary, Orthopaedics<br>Simpson, Hamish; University of Edinburgh, Orthopaedics |
| <b>Primary Subject Heading</b>: | Sports and exercise medicine                                                                                                                                                                                                                                                                                                      |
| Secondary Subject Heading:      | Health policy, Evidence based practice, Public health                                                                                                                                                                                                                                                                             |
| Keywords:                       | SPORTS MEDICINE, rugby, neck                                                                                                                                                                                                                                                                                                      |
|                                 |                                                                                                                                                                                                                                                                                                                                   |

SCHOLARONE™  
Manuscripts

1  
2  
3 **Comparative cervical profiles of adult and under-18 front row rugby players:**  
4 **implications for playing policy.**  
5  
6  
7

8 Hamilton DF<sup>1</sup>, Gatherer D<sup>2</sup>, Robson J<sup>3</sup>, Rennie N<sup>3</sup>, Graham N<sup>3</sup>, Maclean JGB<sup>4</sup>, Simpson  
9 AHRW<sup>1</sup>  
10

11  
12  
13 **Authors Institutions:**  
14

- 15 1. Department of Trauma and Orthopaedics, University of Edinburgh, Edinburgh, UK  
16 2. Gatherer Ltd, Aylesbury, UK  
17 3. Scottish Rugby Union, Edinburgh, UK  
18 4. Department of Orthopaedics, Perth Royal Infirmary, Perth, UK  
19  
20  
21

22 **Corresponding Author:**  
23

24 David Hamilton PhD  
25 Department of Trauma and Orthopaedics  
26 Chancellor's Building,  
27 49 Little France Crescent  
28 University of Edinburgh  
29 EH16 4SB  
30

31 E-mail: d.f.hamilton@ed.ac.uk  
32 tel: 0131 242 6297  
33 fax: 0131 242 6534  
34  
35

36 **KEY WORDS**  
37

38 Rugby; neck, injury, strength  
39  
40

41 **WORD COUNT**  
42

43 2665  
44  
45  
46  
47  
48  
49  
50  
51  
52  
53  
54  
55  
56  
57  
58  
59  
60

**ABSTRACT**

**Objectives:** To compare the cervical isometric strength, fatigue endurance and range of motion of adult and under-18 age grade front row rugby players to inform the development of a safe age group policy with particular reference to scrummaging.

**Design:** Cross-sectional cohort study.

**Setting:** 'Field testing' at Murrayfield stadium.

**Participants:** 30 high performance under-18 players and 21 adult front row rugby players

**Outcome measures:** Isometric neck strength, height, weight and grip strength.

**Results:** Youth players demonstrated the same height and grip strength as the adult players; however the adults were significantly heavier and demonstrated substantially greater isometric strength ( $p < 0.001$ ). Only 2 of the 'elite' younger players could match the adult mean cervical isometric strength value. In contrast to school age players in general, grip strength was poorly associated with neck strength ( $r=0.2$ ) in front row players; instead player weight ( $r=0.4$ ) and the number of years' experience of playing in the front row ( $r=0.5$ ) were the only relevant factor in multivariate modelling of cervical strength ( $R^2=0.3$ ).

**Conclusions:** Extreme forces are generated between opposing front rows in the scrum and avoidance of mismatch is important if the risk of injury is to be minimised. Although elite youth front row rugby players demonstrate the same peripheral strength as their adult counterparts on grip testing, the adults demonstrate significantly greater cervical strength. If older youths and adults are to play together, such findings have to be noted in the development of age group policies with particular reference to the scrum.

## ARTICLE SUMMARY

### Key Findings

Front row rugby players under the age of 18 cannot resist the same cervical loads as adult front row players.

In contrast to general findings on youth players, predictive modelling of cervical strength by proxy measures in this specific group is poor and direct testing is required.

This is directly relevant to age related playing policy for under-18s competing in the front row in the adult game as appropriate neck strength is paramount to preventing scrum collapse and the associated injuries.

Age related playing policy should reflect both generic and position specific physical ability

### Strengths and Limitations

A particular strength of this study is the direct physical cervical testing of representative player cohorts, and the novel data presented.

A limitation is the assumed though unsubstantiated link between cervical strength and injury; though this is mitigated in this specific context through the known link between scrum collapse and cervical injury.

## INTRODUCTION

Rugby is the world's most popular contact, or more appropriately collision, sport and carries an injury risk four times greater than semi-contact sports such as football/soccer.[1] The scrum is an iconic and fundamental part of the game, where two 'forward packs' compete for the ball to restart the game following a minor infringement. It is a test of strength and technique where the cervical spine of the opposing front rows are subjected to huge compressive and shear forces of a sufficient magnitude to result in tissue injury[2] and structural failure.

Around 8% of all injuries in professional rugby are thought to result from the scrum,[3, 4] and rates in amateur and youth rugby are thought to be similarly proportioned. Though this number is comparatively small, these injuries are likely to be of greater severity and involve the spine.[5] Despite a typical match consisting of comparatively few scrums (compared to other contact events, such as tackles), around 40% of all rugby derived acute spinal cord injuries occur in the scrum.[6, 7] Scrum engagement occurs as the head and shoulders of the competing front rows make forceful contact. This is thought to be a particular risk factor for injury, through high compressive and shear loads or hyperflexion of the cervical spine.[6-8] This risk has been somewhat mitigated in recent years by the introduction of 'controlled scrum engagement' where the distance between opposing front rows has been standardised in attempt to reduce acceleration and thus collision forces.[9, 10] Collapsing of the scrum has also been identified as a leading cause of scrum related injury.[6] Premature micro trauma induced degeneration of the cervical spine in front row players[11] and mismatches in size between front row players[6, 12] have been suggested as potential factors for the over-representation of scrum-related injuries, though Brown et al.[7] note that coaching and technical factors have not been well explored in these analyses.

Body size and physical mismatch are considered (at least in part) to be associated to injury risk in schoolboy rugby.[13] Some national governing bodies have introduced a weight category banding for youth rugby to address this concern in children who mature skeletally at differing rates. However once players reach the age of 18 all participants are considered as adults and no such segregation takes place, indeed rugby is a sport that relies on differing physical attributes for the various playing positions. There are circumstances though where those yet to reach their 18<sup>th</sup> birthday may wish to play adult rugby, either through selection processes in the case of particularly gifted players, or through leaving school and joining a club playing in the adult leagues. Policy within Scottish Rugby (prior to the start of the 2013-2014 season) had been that only 'exceptional' 17 year-old players were eligible to play in the adult leagues however there was concern as to the suitability of this policy regarding the front row.

The scrum exposes player's cervical spines to potentially injurious forces that must be attenuated by controlled spinal motion through the cervical musculature, ligaments and intervertebral discs.[14] Appropriate strength of the cervical musculature is thus particularly important for front row players. We have previously demonstrated large variation in the neck strength of school-aged rugby players,[15] however we are not aware of any report of data specific to the front row forwards (either youth or adult).

The aim of this study was to assess the cervical isometric strength and fatigue endurance of both adult and senior school-aged rugby players to assess the ability of under 18 players to compete with adults in the front row of the scrum. A secondary objective was to assess the relationship between isometric strength, and various other physical parameters previously shown to predict this.

## METHODS

### Study design and population

A cross-sectional cohort study was undertaken to investigate the isometric neck strength and fatigue endurance of front row rugby players. 30 senior school-aged players (under-18 age-grade) were assessed at a Scottish Rugby Union (SRU) training day, and 22 adult players in a separate assessment, again organised in conjunction with the SRU.

The youth players were drawn from 21 different clubs/schools from across Scotland and represented the 'elite' end of the senior school-aged front row players in Scotland. The adults were a representative sample of amateur players, drawn from 6 clubs reflecting the top 5 playing levels in Scottish club rugby (as defined by the position of their first XV in the Scottish national leagues). Players were assessed from Dunfermline, Heriots, Murrayfield Wanderers, Musselburgh, Royal High Corstorphine, and Watsonian rugby clubs, comprising players from 1<sup>st</sup>, 2<sup>nd</sup> and 3<sup>rd</sup> teams. Both adult and school-age testing sessions took place at the same facility in Murrayfield stadium in the same environment using the same equipment and operators. Participation was voluntary and signed consent was obtained from all participants. Regional Ethics Committee approval was received for this study.

### Cervical strength and endurance assessment

Isometric cervical muscle testing is well validated.[16-18] We assessed maximal voluntary isometric cervical muscle strength with the GS Gatherer and GS Analysis Suite (Gatherer Systems Ltd, Aylesbury); a custom-built device based on a 300Kg load cell and bespoke software system.

The test was performed employing a previously reported protocol[15, 19] where the head was placed in the neutral anatomic position and subjected to manual controlled incremental loading to positional failure (the point of head movement). Subject report of pain or neurological symptoms also stopped the test. Loading was applied and data was recorded at 20Hz. Peak isometric force generated by the musculature was defined as the maximal load recorded during the test procedure. An average of 3 tests is reported.

An assessment of cervical musculature fatigue endurance was made using the same test equipment. The player was required to exert an isometric extension load at 50% of their recorded mean peak extension force for as long as possible. The player sat in a neutral position with their arms by their side and head connected to the load cell. Players received visual graphical feedback as to the target load applied via a computer monitor. This allowed for maintenance of a consistent load until failure. A single assessment was made of fatigue.

### Anthropometric parameters

Additional measures were made of; height (Leicester Height Measure; SECA, UK), weight (medical grade mechanical flat scales; SECA, UK), grip strength (JAMAR hydraulic hand dynamometer; Sammons Preston, Illinois, USA) and cervical range of motion (Cervical Range of Motion Instrument, Performance Attainment Associates, Minnesota, USA). 3 readings were obtained for each parameter and their average was derived and reported. Demographic data and a self-report questionnaire to determine the individual's rugby playing history and details of neck specific training and injuries were completed by the participants prior to physical assessment.

### Data analysis

Data were analysed using Minitab (Version 16). Data were checked for normality and are reported as means with standard deviation as a measure of dispersion. Independent samples t-tests were used to assess differences in continuous variables between groups unless otherwise stated. Significance was accepted as  $p < 0.05$  incorporating the Benjami-Hochberg correction for the testing of multiple hypotheses, to reduce the possibility of making a type II error in the

1  
2  
3 interpretation of results.[20, 21] Pearson correlation coefficients are reported for bivariate  
4 correlations. Pearson correlation coefficients are reported for bivariate correlations.  
5 Multivariate stepwise regression modelling was performed to achieve the most predictive  
6 model utilising the fewest variables. Predictive variables were selected with a significance of  
7  $p < 0.1$  to accommodate the possibility of variables achieving statistical significance once the  
8 confounding influence of additional variables was controlled.  
9

## 10 11 RESULTS

12  
13 As expected, large differences were observed between groups in terms of age and experience  
14 (years) playing as a front row forward. There was no difference in height or grip strength  
15 between the groups, though the adults were significantly heavier. Cervical range of motion  
16 was similar in measures of extension and rotation, though the elite under-18 group had a  
17 greater range of cervical flexion and rotation (table 1).  
18

19  
20 Substantial differences were observed in isometric strength between groups in extension  
21 (figure 1, table 2) and side flexion (table 2). A larger variation was seen in all parameters of  
22 adult neck strength data compared to the under 18 group. This may be due to the selection  
23 bias of elite players in the younger age group, which may have somewhat homogenised this  
24 data. Despite this potential positive skew in the under-18 data, only 2 of the 30 elite under-18  
25 front row players achieved the adult mean strength value (figure 2).  
26

27  
28 Only 3 of the under-18s achieved the adult mean isometric extension fatigue endurance (total  
29 work, figure 1), this difference between groups was significant at  $p < 0.1$ , possibly reflecting  
30 the large variation in adult scores. The adults performed better in the fatigue assessment,  
31 holding significantly higher average loads for the same length of time as the younger players  
32 (table 2). Surprisingly, only a quarter of all players reported performing routine neck  
33 exercises; split evenly between groups (table 1).  
34

35  
36 Isometric neck strength was most associated with the experience of playing in the front row  
37 ( $r=0.5$ ) (Figure 2), followed by weight ( $r=0.4$ ) and player age ( $r=0.4$ ). In contrast, grip  
38 strength correlated relatively poorly ( $r=0.2$ ) (figure 3). Cervical fatigue endurance was  
39 associated with peak isometric extension strength but correlated poorly ( $r=0.30$ ). Player  
40 weight ( $r=0.6$ ) was the factor most associated with fatigue, again grip strength correlated  
41 poorly ( $r=0.1$ ).  
42

43  
44 Multivariate regression found the best predictive model for isometric strength to include the  
45 number of years' experience playing in the front row and the players' weight (table 3). The  
46 same variables also created the best predictive model of fatigue endurance, again explaining  
47 around a third of the variation in neck strength ( $R^2=0.4$ ).  
48

## 49 50 DISCUSSION

51  
52 This study demonstrates that even elite under-18 front row rugby players, who have  
53 participated in a conditioning and strengthening programme, are able to generate significantly  
54 less cervical muscle force than their adult equivalents. This is highly relevant in determining  
55 the suitability of such players to compete in the adult game, where significant forces are  
56 exerted through the cervical spine of the front row forwards during the scrum. These forces  
57 must be modulated by the cervical musculature, and the reduced isometric strength and  
58 fatigue endurance ratings found in the under-18 players puts them at a significant  
59 disadvantage, with potentially injurious consequences. A particular concern is that the under-  
60 18 players evaluated in this study contained a selection bias of high performance age-grade  
61 players. While this group represents the players most likely to be considered appropriate to

1  
2  
3 play in the adult leagues, it is also likely that they are bigger and stronger than their age-grade  
4 counterparts, suggesting that the actual difference between the adult and under-18 values in  
5 the wider population may be much greater.  
6

7 Little information is available as to the 'neck strength' of rugby players, either adult or  
8 school-aged. We previously assessed the cervical isometric strength of Scottish school  
9 children between the ages of 13 and 18 and found huge variation both within and between  
10 year groups.[15] We are not aware of any other comparable data for adult players or of any  
11 study specifically investigating the cervical isometric strength of the front row forwards.  
12 Using multivariate techniques, we previously reported that player age, weight and grip  
13 strength (as an objective measure of overall strength) was strongly predictive of isometric  
14 neck extension strength in the general school-aged rugby playing population; explaining  
15 around two thirds of the variance in cervical strength. Interestingly in this analysis, the  
16 measure of grip strength was not a strong predictor of cervical strength in this specific group  
17 of front-row players, where player weight and number of years of experience of playing in the  
18 front row were the most important factors. This finding may be a reflection of the general lack  
19 of neck specific training performed among rugby players. It is likely that for most people  
20 scrummaging is the main source of cervical strength training and this is supported by the  
21 finding that only a quarter of the players assessed reported performing regular exercises for  
22 the neck. We propose that the elite under-18 players had reached the same global strength as  
23 their adult counterparts through peripheral strength training; however in the absence of  
24 specific structured conditioning, they could not match the cervical strength the adults had  
25 gained as a result of years of competitive scrummaging.  
26

27 This is to our knowledge the first report of a cervical musculature fatigue endurance  
28 assessment in front row rugby players of any age. In the absence of previous data, it was  
29 necessary to set a safe threshold at which to perform the test, thus the 50% sub-maximal value  
30 was selected to determine reference values for adult and under-18 front row players. While  
31 large differences were observed in fatigue endurance values achieved between adult and  
32 under-18 players, the large spread of the data in the adult cohort diluted the significance of  
33 this finding. Though all players achieved a similar time on fatigue assessment, the 50% sub-  
34 maximal load held by the under-18 group (20kg equivalent) was significantly less than the  
35 adult 50% load (25kg equivalent), as a result of their lower peak forces on the maximal  
36 isometric testing. Now that these benchmark data are available, we recommend that future  
37 fatigue endurance assessment of under-18 players should be performed using the mean adult  
38 50% sub-maximal value (25Kg equivalent), which would represent around 60% of the  
39 average under-18 maximal isometric value found in this study. It is likely that greater  
40 differences would be apparent between adults and under-18 groups had we been able to  
41 employ this testing design, and further help discern those able to compete in the adult front  
42 row. Future work should also look at assessing 'scrum-specific' fatigue endurance; looking  
43 perhaps at repeated bouts of 80% sub-maximal testing over 10-15 seconds which better  
44 reflects the demands of this activity.  
45

46 Preatoni et al.[2] assessed the forces generated in the scrum by 34 forward packs at 6 different  
47 playing grades (from senior-school to international level) and found notable differences in the  
48 forces generated between schools and senior sides. Worryingly, these authors further reported  
49 that the combined compression and shear forces they recorded in the scrums were of a  
50 sufficient magnitude to induce chronic spine injury. Though further information is needed to  
51 understand the link between mechanical forces in the scrum and injury, the shear forces  
52 recorded are of particular concern as a risk factor for chronic degeneration of the spine  
53 through undesirable rotation and bending motions.  
54

55 Perhaps of greater concern is the closed kinetic chain situation of the scrum; where the head is  
56 constrained from moving and loads are applied at both ends. This can lead to a bucking  
57 motion; a process particularly evident in front row forwards when the scrum collapses and the  
58  
59  
60



1  
2  
3 head strikes the ground. If any single front row player has weak cervical extensors, it is  
4 reasonable to suggest that this may enhance the risk of scrum collapse. For the safety of all  
5 six front row players, it is important to recognize, understand and mitigate the biomechanical  
6 issues that occur in a closed kinetic chain situation where the forces cannot be vectored away  
7 from the spine.  
8

9  
10 In the elite under-18 group assessed, only 2 of 30 players recorded the mean cervical  
11 isometric strength of the adult cohort. Although a few individuals may possess the physical  
12 characteristics (and technical skill) to compete with adult players, our results suggest that  
13 policy should prevent players under the age of 18 playing in the front row of an adult match,  
14 unless specific criteria is met. In contrast to the general schoolboy population, predictive  
15 modelling of cervical strength using alternative physical characteristics was poor. As such,  
16 specific testing would need to be employed to identify those few individuals able to match  
17 their adult counterparts in terms of cervical strength. The concept of a passport to play in the  
18 front row is well established in some countries as a means of ensuring players are  
19 appropriately equipped to cope with the rigours of scrummaging. Objective measures of the  
20 individuals' cervical strength profile should be an integral part of any selection process for  
21 players wishing to play in the front row.  
22

## 23 **ACKNOWLEDGEMENTS**

24  
25 We wish to extend thanks to the staff of the Scottish Rugby Union, Prof Jimmy Hutchison  
26 and Mr Richard Nutton who facilitated this work, and to all the players who took part in the  
27 assessments.  
28

## 29 **AUTHOR CONTRIBUTIONS**

30  
31 All authors listed were involved in the study design and data acquisition. DH performed the  
32 analysis and drafted the manuscript. All authors revised and approved the submission.  
33  
34

## 35 **FUNDING STATEMENT**

36  
37 This research received no specific grant from any funding agency in the public, commercial  
38 or not-for-profit sectors'.  
39  
40

## 41 **CONFLICT OF INTEREST**

42  
43 DG has shares in Gatherer Systems who manufacture and supplied the testing equipment used  
44 in this study. The other authors declare no conflict of interest.  
45  
46

## 47 **DATA SHARING STATEMENT**

48  
49 The data are held in a secure database at the University of Edinburgh. Any party wishing to  
50 access unpublished data should discuss with the corresponding author in the first instance.  
51  
52

## 53 **REFERENCES**

54  
55 [1]. Palmer-Green DS, Stokes KA, Fuller CW, et al. Match injuries in English youth academy  
56 and schools rugby union: an epidemiological study. *Am J Sports Med.* 2013;41:749-55.  
57  
58  
59  
60

- 1  
2  
3  
4 [2]. Preatoni E, Stokes KA, England ME, et al. The influence of playing level on the  
5 biomechanical demands experienced by rugby union forwards during machine scrummaging.  
6 *Scand J Med Sci Sports* 2013;23:178-184  
7
- 8 [3]. Brooks JHM, Fuller CW, Kemp SPT, et al. Epidemiology of injuries in English  
9 Professional rugby union: part 1 match injuries. *Br J Sports Med* 2005;39:757-766  
10
- 11 [4]. Brooks JHM, Fuller CW, Kemp SPT, et al. Epidemiology of injuries in English  
12 Professional rugby union: part 2 training injuries. *Br J Sports Med* 2005;39:767-775  
13
- 14 [5]. MacLean JG, Hutchison JD. Serious neck injuries in U19 rugby union players: an audit of  
15 admissions to spinal injury units in Great Britain and Ireland. *Br J Sports Med* 2012;46:591-4.  
16
- 17 [6]. Quarrie KL, Cantu RC, Chalmers DJ. Rugby union injuries to the cervical spine and  
18 spinal cord. *Sports Med* 2002;32:633-53  
19
- 20 [7]. Brown JC, Lambert MI, Verhagen E, et al. The incidence of rugby-related catastrophic  
21 injuries (including cardiac events) in South Africa from 2008 to 2011: a cohort study. *BMJ*  
22 *open* 2013;3:e002475  
23
- 24 [8]. Brooks JHM, Kemp SPT. Injury-prevention priorities according to playing position in  
25 professional rugby union players *Br J Sports Med* 2011;45:765-775.  
26
- 27 [9]. Gianotti S, Hume PA, Hopkins WG, et al. Interim evaluation of the effect of a new scrum  
28 law on neck and back injuries in rugby union. *Br J Sports Med* 2013;42:427-430  
29
- 30 [10]. Fuller CW, Brooks JH, Kemp SP. Spinal injuries in professional rugby union: a  
31 prospective cohort study. *Clin J Sport Med.* 2007;17:10-6  
32
- 33 [11]. Scher AT. Rugby injuries to the cervical spine and spinal cord: a 10-year review. *Clin*  
34 *Sports Med.* 1998;17:195-206  
35
- 36 [12]. Viljoen W, Patricios J. BokSmart - implementing a National Rugby Safety Programme.  
37 *Br J Sports Med.* 2012;46:692-3  
38
- 39 [13]. Nutton RW, Hamilton DF, Hutchison JD, et al. Variation in physical development in  
40 schoolboy rugby players: can maturity testing reduce mismatch? *BMJ Open.* 2012;2:e001149  
41
- 42 [14]. Torg J, Ramsey-Emrhein J. Suggested management guidelines for participation in  
43 collision activities with congenital, developmental, or post injury lesions involving the  
44 cervical spine. *Med Sci Sports Exerc.* 1997;29(7):256-272.  
45
- 46 [15]. Hamilton DF, Gatherer D, Jenkins PJ, et al. Age-related differences in the neck strength  
47 of adolescent rugby players: A CROSS-SECTIONAL COHORT STUDY OF SCOTTISH  
48 SCHOOLCHILDREN. *Bone Joint Res* 2012;1:152-7.  
49
- 50 [16]. Garge's GL, Medina D, Milutinovic L, et al. Normative database of isometric cervical  
51 strength in a healthy population. *Med Sci Sports Exerc* 2002;33:464-70.  
52
- 53 [17]. Jordan A, Mehlsen J, Bu'low PM, et al. Maximal isometric strength of the cervical  
54 musculature in 100 healthy volunteers. *Spine* 1999;24:1343-8.  
55
- 56 [18]. Chiu TT, Sing KL. Evaluation of cervical range of motion and isometric neck muscle  
57 strength: reliability and validity. *Clin Rehabil* 2002;16:851-8.  
58  
59  
60

1  
2  
3  
4 [19]. Peek K, Gatherer D. The rehabilitation of a professional rugby union player following a  
5 C7/T1 posterior microdiscectomy. *Phys Ther Sport* 2005;**6**:195–200.  
6

7 [20]. Benjamini Y, and Hochberg Y. Controlling the false discovery rate: a practical and  
8 powerful approach to multiple testing. *J. R. Statist. Soc. B* 1995;**57**, 289–300.  
9

10 [21]. Storey JD, "The positive false discovery rate: A Bayesian interpretation and the q-value"  
11 *Annals of Statistics* 2003;31: 2013–2035  
12  
13  
14  
15  
16  
17  
18  
19  
20  
21  
22  
23  
24  
25  
26  
27  
28  
29  
30  
31  
32  
33  
34  
35  
36  
37  
38  
39  
40  
41  
42  
43  
44  
45  
46  
47  
48  
49  
50  
51  
52  
53  
54  
55  
56  
57  
58  
59  
60

## TABLES

**Table 1- Anthropometric data**

|                                     | Under 18     | Adult         | Significance        |
|-------------------------------------|--------------|---------------|---------------------|
| Age (years)                         | 16.7 (16-17) | 27.2 (19-50)  | <0.001 <sup>‡</sup> |
| Experience of the front row (years) | 5.0 (1-12)   | 14.3 (2-26)   | <0.001 <sup>‡</sup> |
| Regular neck strengthening (yes/no) | 7/23         | 5/21          | 0.959 <sup>*</sup>  |
| Height (cm)                         | 178.7 (5.54) | 178.7 (5.91)  | 0.960               |
| Weight (kg)                         | 96.0 (13.69) | 107.8 (13.67) | 0.004 <sup>‡</sup>  |
| Grip strength (kg)                  | 47.8 (5.31)  | 49.56 (7.56)  | 0.360               |
| Cervical Range of Motion (degrees)  |              |               |                     |
| Extension                           | 65.33 (8.70) | 65.62 (6.62)  | 0.895               |
| Flexion                             | 58.50 (8.32) | 44.10 (8.93)  | <0001 <sup>‡</sup>  |
| Side flexion (left)                 | 49.17 (5.88) | 44.33 (6.51)  | 0.010 <sup>‡</sup>  |
| Side flexion (right)                | 45.60 (8.93) | 41.33 (6.18)  | 0.049               |
| Rotation (left)                     | 66.50 (7.67) | 65.90 (6.80)  | 0.772               |
| Rotation (right)                    | 67.83 (8.06) | 64.76 (6.83)  | 0.149               |

Age and experience reported as mean (range), all other variables as mean (SD); <sup>‡</sup> Remains significant at the 0.05 level correcting for multiple testing; <sup>\*</sup>Chi Square

**Table 2 - Cervical strength assessment**

|                         | Under 18      | Adult         | Significance        |
|-------------------------|---------------|---------------|---------------------|
| Isometric Strength (kg) |               |               |                     |
| Extension               | 41.70 (6.74)  | 53.70 (12.36) | <0.001 <sup>‡</sup> |
| Flexion                 | 22.59 (5.96)  | 25.40 (5.76)  | 0.098               |
| Side flexion (left)     | 32.24 (6.16)  | 40.53 (9.76)  | 0.002 <sup>‡</sup>  |
| Side flexion (right)    | 31.83 (6.08)  | 42.48 (7.59)  | <0.001 <sup>‡</sup> |
| Fatigue                 |               |               |                     |
| Total (kg/sec)          | 1305 (236.8)  | 1551 (512)    | 0.058               |
| Time achieved (sec)     | 67.10 (21.67) | 71.81 (9.73)  | 0.390               |
| Average load (kg)       | 18.25 (2.82)  | 23.54 (5.13)  | <0.001 <sup>‡</sup> |

All data reported as mean (SD). <sup>‡</sup> Remains significant at the 0.05 level correcting for multiple testing

**Table 3 – Multivariate predictive modelling of isometric neck extension (R<sup>2</sup>=0.31)**

| Predictor            | Co-efficient | P value |
|----------------------|--------------|---------|
| Front row experience | 0.63         | 0.035   |
| Weight               | 0.22         | 0.003   |

1  
2  
3 **FIGURE LEGEND**  
4

5  
6 **Figure 1 - Differences in cervical strength by group**  
7

8  
9 **Figure 2 – Strong relationship between cervical strength and playing experience**  
10

11  
12 **Figure 3 – Weak relationship between grip strength and cervical strength**  
13

14  
15  
16  
17  
18  
19  
20  
21  
22  
23  
24  
25  
26  
27  
28  
29  
30  
31  
32  
33  
34  
35  
36  
37  
38  
39  
40  
41  
42  
43  
44  
45  
46  
47  
48  
49  
50  
51  
52  
53  
54  
55  
56  
57  
58  
59  
60

For peer review only

1  
2  
3  
4  
5  
6  
7  
8  
9  
10  
11  
12  
13  
14  
15  
16  
17  
18  
19  
20  
21  
22  
23  
24  
25  
26  
27  
28  
29  
30  
31  
32  
33  
34  
35  
36  
37  
38  
39  
40  
41  
42  
43  
44  
45  
46  
47  
48  
49  
50  
51  
52  
53  
54  
55  
56  
57  
58  
59  
60

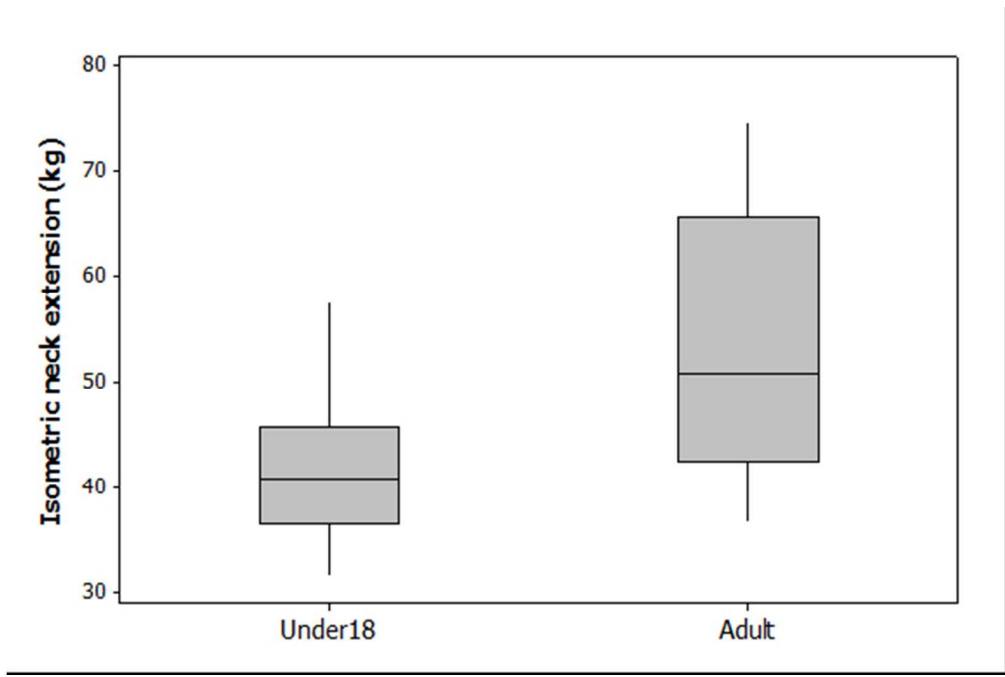

Figure 1 - Differences in cervical strength by group  
152x101mm (96 x 96 DPI)

Review only

1  
2  
3  
4  
5  
6  
7  
8  
9  
10  
11  
12  
13  
14  
15  
16  
17  
18  
19  
20  
21  
22  
23  
24  
25  
26  
27  
28  
29  
30  
31  
32  
33  
34  
35  
36  
37  
38  
39  
40  
41  
42  
43  
44  
45  
46  
47  
48  
49  
50  
51  
52  
53  
54  
55  
56  
57  
58  
59  
60

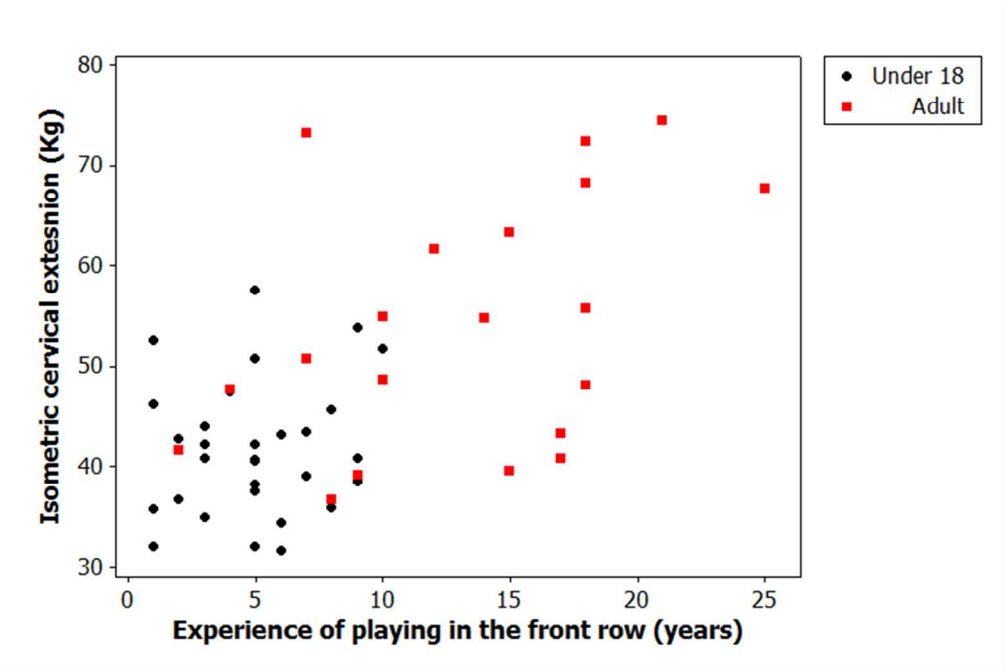

Figure 2 - strong relationship between cervical strength and playing experience  
190x127mm (96 x 96 DPI)

Review only

1  
2  
3  
4  
5  
6  
7  
8  
9  
10  
11  
12  
13  
14  
15  
16  
17  
18  
19  
20  
21  
22  
23  
24  
25  
26  
27  
28  
29  
30  
31  
32  
33  
34  
35  
36  
37  
38  
39  
40  
41  
42  
43  
44  
45  
46  
47  
48  
49  
50  
51  
52  
53  
54  
55  
56  
57  
58  
59  
60

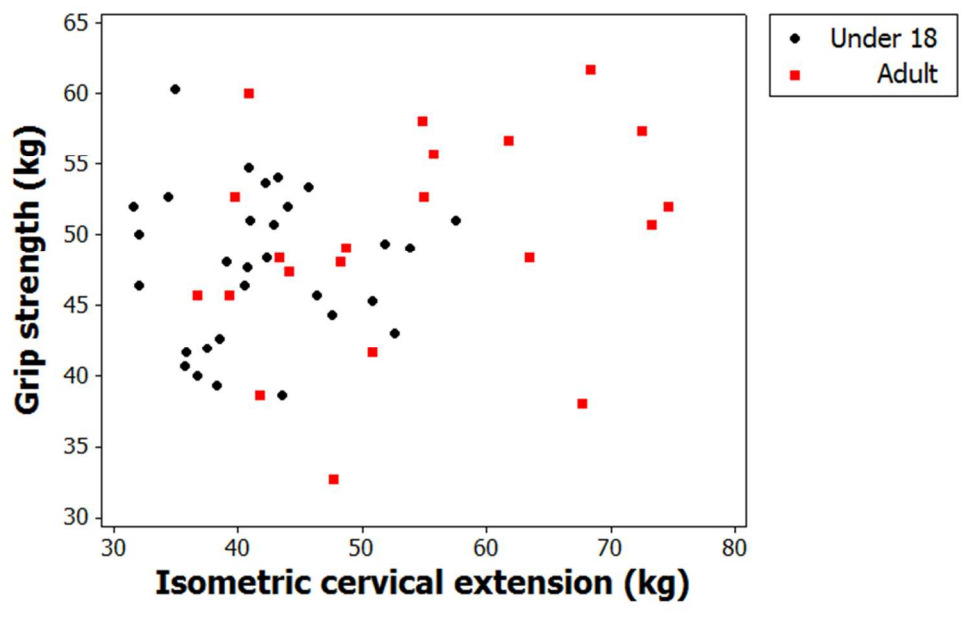

Figure 3 - Weak relationship between grip strength and cervical strength  
190x127mm (96 x 96 DPI)

Review only



STROBE 2007 (v4) Statement—Checklist of items that should be included in reports of *cohort studies*

| Section/Topic                | Item # | Recommendation                                                                                                                                                                       | Reported on page # |
|------------------------------|--------|--------------------------------------------------------------------------------------------------------------------------------------------------------------------------------------|--------------------|
| Title and abstract           | 1      | (a) Indicate the study's design with a commonly used term in the title or the abstract                                                                                               | 2                  |
|                              |        | (b) Provide in the abstract an informative and balanced summary of what was done and what was found                                                                                  | 2                  |
| <b>Introduction</b>          |        |                                                                                                                                                                                      |                    |
| Background/rationale         | 2      | Explain the scientific background and rationale for the investigation being reported                                                                                                 | 3                  |
| Objectives                   | 3      | State specific objectives, including any prespecified hypotheses                                                                                                                     | 3                  |
| <b>Methods</b>               |        |                                                                                                                                                                                      |                    |
| Study design                 | 4      | Present key elements of study design early in the paper                                                                                                                              | 3,4                |
| Setting                      | 5      | Describe the setting, locations, and relevant dates, including periods of recruitment, exposure, follow-up, and data collection                                                      | 4                  |
| Participants                 | 6      | (a) Give the eligibility criteria, and the sources and methods of selection of participants. Describe methods of follow-up                                                           | 4                  |
|                              |        | (b) For matched studies, give matching criteria and number of exposed and unexposed                                                                                                  |                    |
| Variables                    | 7      | Clearly define all outcomes, exposures, predictors, potential confounders, and effect modifiers. Give diagnostic criteria, if applicable                                             | 4                  |
| Data sources/<br>measurement | 8*     | For each variable of interest, give sources of data and details of methods of assessment (measurement). Describe comparability of assessment methods if there is more than one group | 4                  |
| Bias                         | 9      | Describe any efforts to address potential sources of bias                                                                                                                            | 4                  |
| Study size                   | 10     | Explain how the study size was arrived at                                                                                                                                            | 4                  |
| Quantitative variables       | 11     | Explain how quantitative variables were handled in the analyses. If applicable, describe which groupings were chosen and why                                                         | 4                  |
| Statistical methods          | 12     | (a) Describe all statistical methods, including those used to control for confounding                                                                                                | 4                  |
|                              |        | (b) Describe any methods used to examine subgroups and interactions                                                                                                                  |                    |
|                              |        | (c) Explain how missing data were addressed                                                                                                                                          |                    |
|                              |        | (d) If applicable, explain how loss to follow-up was addressed                                                                                                                       |                    |
|                              |        | (e) Describe any sensitivity analyses                                                                                                                                                |                    |
| <b>Results</b>               |        |                                                                                                                                                                                      |                    |

|                          |     |                                                                                                                                                                                                                                                                                                                                                                                                               |         |
|--------------------------|-----|---------------------------------------------------------------------------------------------------------------------------------------------------------------------------------------------------------------------------------------------------------------------------------------------------------------------------------------------------------------------------------------------------------------|---------|
| Participants             | 13* | (a) Report numbers of individuals at each stage of study—eg numbers potentially eligible, examined for eligibility, confirmed eligible, included in the study, completing follow-up, and analysed<br>(b) Give reasons for non-participation at each stage<br>(c) Consider use of a flow diagram                                                                                                               | 4       |
| Descriptive data         | 14* | (a) Give characteristics of study participants (eg demographic, clinical, social) and information on exposures and potential confounders<br>(b) Indicate number of participants with missing data for each variable of interest<br>(c) Summarise follow-up time (eg, average and total amount)                                                                                                                | 4       |
| Outcome data             | 15* | Report numbers of outcome events or summary measures over time                                                                                                                                                                                                                                                                                                                                                | 5       |
| Main results             | 16  | (a) Give unadjusted estimates and, if applicable, confounder-adjusted estimates and their precision (eg, 95% confidence interval). Make clear which confounders were adjusted for and why they were included<br>(b) Report category boundaries when continuous variables were categorized<br>(c) If relevant, consider translating estimates of relative risk into absolute risk for a meaningful time period | 5       |
| Other analyses           | 17  | Report other analyses done—eg analyses of subgroups and interactions, and sensitivity analyses                                                                                                                                                                                                                                                                                                                |         |
| <b>Discussion</b>        |     |                                                                                                                                                                                                                                                                                                                                                                                                               |         |
| Key results              | 18  | Summarise key results with reference to study objectives                                                                                                                                                                                                                                                                                                                                                      | 6, 7, 8 |
| <b>Limitations</b>       |     |                                                                                                                                                                                                                                                                                                                                                                                                               |         |
| Interpretation           | 20  | Give a cautious overall interpretation of results considering objectives, limitations, multiplicity of analyses, results from similar studies, and other relevant evidence                                                                                                                                                                                                                                    | 6, 7, 8 |
| Generalisability         | 21  | Discuss the generalisability (external validity) of the study results                                                                                                                                                                                                                                                                                                                                         | 8, 9    |
| <b>Other information</b> |     |                                                                                                                                                                                                                                                                                                                                                                                                               |         |
| Funding                  | 22  | Give the source of funding and the role of the funders for the present study and, if applicable, for the original study on which the present article is based                                                                                                                                                                                                                                                 | 9       |

\*Give information separately for cases and controls in case-control studies and, if applicable, for exposed and unexposed groups in cohort and cross-sectional studies.

**Note:** An Explanation and Elaboration article discusses each checklist item and gives methodological background and published examples of transparent reporting. The STROBE checklist is best used in conjunction with this article (freely available on the Web sites of PLoS Medicine at <http://www.plosmedicine.org/>, Annals of Internal Medicine at <http://www.annals.org/>, and Epidemiology at <http://www.epidem.com/>). Information on the STROBE Initiative is available at [www.strobe-statement.org](http://www.strobe-statement.org).

# BMJ Open

## Comparative cervical profiles of adult and under-18 front row rugby players: implications for playing policy.

|                                 |                                                                                                                                                                                                                                                                                                                                   |
|---------------------------------|-----------------------------------------------------------------------------------------------------------------------------------------------------------------------------------------------------------------------------------------------------------------------------------------------------------------------------------|
| Journal:                        | <i>BMJ Open</i>                                                                                                                                                                                                                                                                                                                   |
| Manuscript ID:                  | bmjopen-2014-004975.R1                                                                                                                                                                                                                                                                                                            |
| Article Type:                   | Research                                                                                                                                                                                                                                                                                                                          |
| Date Submitted by the Author:   | 25-Mar-2014                                                                                                                                                                                                                                                                                                                       |
| Complete List of Authors:       | Hamilton, David; University of Edinburgh, Orthopaedics<br>Gatherer, Don; Gatherer Limited,<br>Robson, James; Scottish Rugby Union,<br>Graham, Neil; Scottish Rugby Union,<br>Rennie, Nick; Scottish Rugby Union,<br>MacLean, James; Perth Royal Infirmary, Orthopaedics<br>Simpson, Hamish; University of Edinburgh, Orthopaedics |
| <b>Primary Subject Heading</b>: | Sports and exercise medicine                                                                                                                                                                                                                                                                                                      |
| Secondary Subject Heading:      | Health policy, Evidence based practice, Public health                                                                                                                                                                                                                                                                             |
| Keywords:                       | SPORTS MEDICINE, rugby, neck                                                                                                                                                                                                                                                                                                      |
|                                 |                                                                                                                                                                                                                                                                                                                                   |

SCHOLARONE™  
Manuscripts

1  
2  
3 **Comparative cervical profiles of adult and under-18 front row rugby players:**  
4 **implications for playing policy.**  
5  
6  
7

8 Hamilton DF<sup>1</sup>, Gatherer D<sup>2</sup>, Robson J<sup>3</sup>, Graham N<sup>3</sup>, Rennie N<sup>3</sup>, Maclean JGB<sup>4</sup>, Simpson  
9 AHRW<sup>1</sup>  
10

11  
12  
13 **Authors Institutions:**  
14

- 15 1. Department of Trauma and Orthopaedics, University of Edinburgh, Edinburgh, UK  
16 2. Gatherer Ltd, Aylesbury, UK  
17 3. Scottish Rugby Union, Edinburgh, UK  
18 4. Department of Orthopaedics, Perth Royal Infirmary, Perth, UK  
19  
20  
21

22 **Corresponding Author:**  
23

24 David Hamilton PhD  
25 Department of Trauma and Orthopaedics  
26 Chancellor's Building,  
27 49 Little France Crescent  
28 University of Edinburgh  
29 EH16 4SB  
30

31 E-mail: d.f.hamilton@ed.ac.uk  
32 tel: 0131 242 6297  
33 fax: 0131 242 6534  
34  
35

36 **KEY WORDS**  
37

38 Rugby; neck, injury, strength  
39  
40

41 **WORD COUNT**  
42

43 2665  
44  
45  
46  
47  
48  
49  
50  
51  
52  
53  
54  
55  
56  
57  
58  
59  
60

**ABSTRACT**

**Objectives:** To compare the cervical isometric strength, fatigue endurance and range of motion of adult and under-18 age grade front row rugby players to inform the development of a safe age group policy with particular reference to scrummaging.

**Design:** Cross-sectional cohort study.

**Setting:** 'Field testing' at Murrayfield stadium.

**Participants:** 30 high performance under-18 players and 21 adult front row rugby players

**Outcome measures:** Isometric neck strength, height, weight and grip strength.

**Results:** Youth players demonstrated the same height and grip strength as the adult players; however the adults were significantly heavier and demonstrated substantially greater isometric strength ( $p < 0.001$ ). Only 2 of the 'elite' younger players could match the adult mean cervical isometric strength value. In contrast to school age players in general, grip strength was poorly associated with neck strength ( $r=0.2$ ) in front row players; instead player weight ( $r=0.4$ ) and the number of years' experience of playing in the front row ( $r=0.5$ ) were the only relevant factor in multivariate modelling of cervical strength ( $R^2=0.3$ ).

**Conclusions:** Extreme forces are generated between opposing front rows in the scrum and avoidance of mismatch is important if the risk of injury is to be minimised. Although elite youth front row rugby players demonstrate the same peripheral strength as their adult counterparts on grip testing, the adults demonstrate significantly greater cervical strength. If older youths and adults are to play together, such findings have to be noted in the development of age group policies with particular reference to the scrum.

## ARTICLE SUMMARY

### Key Findings

Front row rugby players under the age of 18 cannot resist the same cervical loads as adult front row players.

In contrast to general findings on youth players, predictive modelling of cervical strength by proxy measures in this specific group is poor and direct testing is required.

This is directly relevant to age related playing policy for under-18s competing in the front row in the adult game as appropriate neck strength is likely to be important in preventing scrum collapse and the associated injuries.

Age related playing policy should reflect both generic and position specific physical ability

### Strengths and Limitations

A particular strength of this study is the direct physical cervical testing of representative player cohorts, and the novel data presented.

A limitation is the assumed though unsubstantiated link between cervical strength and injury; though this is mitigated in this specific context through the known link between scrum collapse and cervical injury.

## INTRODUCTION

Rugby is the world's most popular contact, or more appropriately collision, sport and carries an injury risk four times greater than semi-contact sports such as football/soccer.[1] The scrum is an iconic and fundamental part of the game, where two 'forward packs' compete for the ball to restart the game following a minor infringement. It is a test of strength and technique where the cervical spine of the opposing front rows are subjected to huge compressive and shear forces of a sufficient magnitude to result in tissue injury[2] and structural failure.

Around 8% of all injuries in professional rugby are thought to result from the scrum,[3, 4] and rates in amateur and youth rugby are thought to be similarly proportioned. Though this number is comparatively small, these injuries are likely to be of greater severity and involve the spine.[5] Despite a typical match consisting of comparatively few scrums (compared to other contact events, such as tackles), around 40% of all rugby derived acute spinal cord injuries occur in the scrum.[6, 7] Scrum engagement occurs as the head and shoulders of the competing front rows make forceful contact. This is thought to be a particular risk factor for injury, through high compressive and shear loads or hyperflexion of the cervical spine.[6-8] This risk has been somewhat mitigated in recent years by the introduction of 'controlled scrum engagement' where the distance between opposing front rows has been standardised in attempt to reduce acceleration and thus collision forces.[9, 10] Collapsing of the scrum has also been identified as a leading cause of scrum related injury.[6, 11] Premature micro trauma induced degeneration of the cervical spine in front row players[12] and mismatches in size between front row players[6, 13] have been suggested as potential factors for the over-representation of scrum-related injuries, though Brown et al.[7] note that coaching and technical factors have not been well explored in these analyses.

Body size and physical mismatch are considered (at least in part) to be associated to injury risk in schoolboy rugby.[14] Some national governing bodies have introduced a weight category banding for youth rugby to address this concern in children who mature skeletally at differing rates. However once players reach the age of 18 all participants are considered as adults and no such segregation takes place, indeed rugby is a sport that relies on differing physical attributes for the various playing positions. There are circumstances though where those yet to reach their 18<sup>th</sup> birthday may wish to play adult rugby, either through selection processes in the case of particularly gifted players, or through leaving school and joining a club playing in the adult leagues. Policy within Scottish Rugby (prior to the start of the 2013-2014 season) had been that only 'exceptional' 17 year-old players were eligible to play in the adult leagues however there was concern as to the suitability of this policy regarding the front row.

The scrum exposes players' cervical spines to potentially injurious forces that must be attenuated by controlled spinal motion through the cervical musculature, ligaments and intervertebral discs.[15] Appropriate strength of the cervical musculature is thus particularly important for front row players. We have previously demonstrated large variation in the neck strength of school-aged rugby players,[16] however we are not aware of any report of data specific to the front row forwards (either youth or adult).

The aim of this study was to assess the cervical isometric strength and fatigue endurance of both adult and senior school-aged rugby players to assess the ability of under18 players to compete with adults in the front row of the scrum. A secondary objective was to assess the relationship between isometric strength, and various other physical parameters previously shown to predict this.

## METHODS

### Study design and population

A cross-sectional cohort study was undertaken to investigate the isometric neck strength and fatigue endurance of front row rugby players. 30 senior school-aged players (under-18 age-grade) were assessed at a Scottish Rugby Union (SRU) training day, and 22 adult players in a separate assessment, again organised in conjunction with the SRU.

The youth players were drawn from 21 different clubs/schools from across Scotland and represented the 'elite' end of the senior school-aged front row players in Scotland. The adults were a representative sample of amateur players, drawn from 6 clubs reflecting the top 5 playing levels in Scottish club rugby (as defined by the position of their first XV in the Scottish national leagues). This range was decided upon to reflect the spectrum of levels that the under-18 group may play. Players were assessed from Dunfermline, Heriots, Murrayfield Wanderers, Musselburgh, Royal High Corstorphine, and Watsonian rugby clubs, comprising players from 1<sup>st</sup>, 2<sup>nd</sup> and 3<sup>rd</sup> teams. Both adult and school-age testing sessions took place at the same facility in Murrayfield stadium in the same environment using the same equipment and operators. Participation was voluntary and signed consent was obtained from all participants. Regional Ethics Committee approval was received for this study.

### Cervical strength and endurance assessment

Isometric cervical muscle testing is well validated.[17-19] We assessed maximal voluntary isometric cervical muscle strength with the GS Gatherer and GS Analysis Suite (Gatherer Systems Ltd, Aylesbury); a custom-built device based on a 300Kg load cell and bespoke software system.

The test was performed employing a previously reported protocol[16, 20] where the head was placed in the neutral anatomic position and subjected to manual controlled incremental loading to positional failure (the point of head movement). Subject report of pain or neurological symptoms also stopped the test. Loading was applied and data was recorded at 20Hz. Peak isometric force generated by the musculature was defined as the maximal load recorded during the test procedure. An average of 3 tests is reported, with a 60 second rest period enforced between assessments.

An assessment of cervical musculature fatigue endurance was made using the same test equipment. The player was required to exert an isometric extension load at 50% of their recorded mean peak extension force for as long as possible. The player sat in a neutral position with their arms by their side and head connected to the load cell. Players received visual graphical feedback as to the target load applied via a computer monitor. This allowed for maintenance of a consistent load until failure. A single assessment was made of fatigue.

### Anthropometric parameters

Additional measures were made of; height (Leicester Height Measure; SECA, UK), weight (medical grade mechanical flat scales; SECA, UK), grip strength (JAMAR hydraulic hand dynamometer; Sammons Preston, Illinois, USA) and cervical range of motion (Cervical Range of Motion Instrument, Performance Attainment Associates, Minnesota, USA). 3 readings were obtained for each parameter and their average was derived and reported. Demographic data and a self-report questionnaire to determine the individual's rugby playing history and details of neck specific training and injuries were completed by the participants prior to physical assessment.

### Data analysis

Data were analysed using Minitab (Version 16). Data were checked for normality and are reported as means with standard deviation or 95% confidence intervals of the mean as a measure of dispersion. Independent samples t-tests were used to assess differences in



1  
2  
3 continuous variables between groups unless otherwise stated. Significance was accepted as  $p < 0.05$  incorporating the Benjami-Hochberg correction for the testing of multiple hypotheses,  
4  
5 to reduce the possibility of making a type I error in the interpretation of results.[21, 22]  
6

7 To assess the secondary research question as to predictive modelling of front row player neck  
8 strength all data was considered as a single cohort. Pearson correlation coefficients are  
9 reported for bivariate correlations. Stepwise regression modelling was performed to achieve  
10 the most predictive model for global neck strength (for which we use isometric extension)  
11 utilising the fewest variables. Predictive variables were selected with a significance of  $p < 0.1$   
12 to accommodate the possibility of variables achieving statistical significance once the  
13 confounding influence of additional variables was controlled. A potential limitation of this  
14 approach is that the homogenised under-18 group may cause a clustering effect in the data.  
15 Separate analysis of the adult data demonstrates the same relationships as reported for the  
16 entire cohort lending credibility to the results presented. Further, all players assessed are  
17 eligible to play in the adult leagues and can thus be considered representative of a single  
18 cohort in the context of our secondary research question; to assess the influence of various  
19 physical variables (previously suggested to reflect the variation in cervical strength in a  
20 school aged population) in the specific situation of the front row player.  
21

## 22 RESULTS

23  
24 As expected, large differences were observed between groups in terms of age and experience  
25 (years) playing as a front row forward. There was no difference in height or grip strength  
26 between the groups, though the adults were significantly heavier. Cervical range of motion  
27 was similar in measures of extension and rotation, though the elite under-18 group had a  
28 greater range of cervical flexion and side flexion (table 1).  
29

30 Substantial differences were observed in isometric strength between groups in extension  
31 (figure 1, table 2) and side flexion (table 2); the under 18 group approximately 20% weaker  
32 than the adult group. A larger variation was seen in all parameters of adult neck strength data  
33 compared to the under 18 group. This may be due to the selection bias of elite players in the  
34 younger age group, which may have somewhat homogenised this data. Despite this potential  
35 positive skew in the under-18 data, only 2 of the 30 elite under-18 front row players achieved  
36 the adult mean strength value (figure 1).  
37

38 Only 3 of the under-18s achieved the adult mean isometric extension fatigue endurance  
39 (impulse, table 2), this difference between groups was significant at  $p < 0.1$ , possibly  
40 reflecting the large variation in adult scores. The adults performed better in the fatigue  
41 assessment, holding significantly higher average loads for the same length of time as the  
42 younger players (table 2). Surprisingly, only a quarter of all players reported performing  
43 routine neck exercises; split evenly between groups (table 1).  
44

### 45 Predictive modelling;

46 Isometric neck strength was most associated with the experience of playing in the front row  
47 ( $r=0.5, p<0.001$ ) (Figure 2), followed by weight ( $r=0.4, p=0.004$ ) and player age ( $r=0.4,$   
48  $p=0.005$ ). In contrast, grip strength correlated relatively poorly ( $r=0.2, p=0.09$ ) (figure 3).  
49 Cervical fatigue endurance was associated with peak isometric extension strength but  
50 correlated poorly ( $r=0.30, p=0.08$ ). Player weight ( $r=0.6, p=0.007$ ) was the factor most  
51 associated with fatigue, again grip strength correlated poorly ( $r=0.1, p=0.6$ ).  
52

53  
54 Stepwise regression determined the best predictive model for isometric strength to include  
55 the number of years' experience playing in the front row and the players' weight (table 3).  
56 The greatest single contributing variable was the experience of playing in the front row,  
57 which explained around 22% of the variation in isometric extension. The same variables also  
58  
59  
60

1  
2  
3 created the best predictive model of fatigue endurance, again explaining around a third of the  
4 variation in neck strength ( $R^2=0.4$ ).  
5  
6

## 7 DISCUSSION

8  
9 This study demonstrates that even elite under-18 front row rugby players, who have  
10 participated in a conditioning and strengthening programme, are able to generate significantly  
11 less cervical muscle force than their adult equivalents. This is highly relevant in determining  
12 the suitability of such players to compete in the adult game, where significant forces are  
13 exerted through the cervical spine of the front row forwards during the scrum. These forces  
14 must be modulated by the cervical musculature, and the reduced isometric strength and  
15 fatigue endurance ratings found in the under-18 players puts them at a significant  
16 disadvantage, with potentially injurious consequences. A particular concern is that the under-  
17 18 players evaluated in this study contained a selection bias of high performance age-grade  
18 players. While this group represents the players most likely to be considered appropriate to  
19 play in the adult leagues, it is also likely that they are bigger and stronger than their age-grade  
20 counterparts, suggesting that the actual difference between the adult and under-18 values in  
21 the wider population may be much greater.  
22

23 Little information is available as to the 'neck strength' of rugby players, either adult or  
24 school-aged. We previously assessed the cervical isometric strength of Scottish school  
25 children between the ages of 13 and 18 and found huge variation both within and between  
26 year groups.[16] We are not aware of any other comparable data for adult players or of any  
27 study specifically investigating the cervical isometric strength of the front row forwards.  
28 Using multivariate techniques, we previously reported that player age, weight and grip  
29 strength (as an objective measure of overall strength) was strongly predictive of isometric  
30 neck extension strength in the general school-aged rugby playing population; explaining  
31 around two thirds of the variance in cervical strength. Interestingly in this analysis, the  
32 measure of grip strength was not a strong predictor of cervical strength in this specific group  
33 of front-row players, where player weight and number of years of experience of playing in the  
34 front row were the most important factors. This finding may be a reflection of the general lack  
35 of neck specific training performed among rugby players. It is likely that for most people  
36 scrummaging is the main source of cervical strength training and this is supported by the  
37 finding that only a quarter of the players assessed reported performing regular exercises for  
38 the neck. We propose that the elite under-18 players had reached the same global strength as  
39 their adult counterparts through peripheral strength training; however in the absence of  
40 specific structured conditioning, they could not match the cervical strength the adults had  
41 gained as a result of years of competitive scrummaging.  
42

43 This is to our knowledge the first report of a cervical musculature fatigue endurance  
44 assessment in front row rugby players of any age. In the absence of previous data, it was  
45 necessary to set a safe threshold at which to perform the test, thus the 50% sub-maximal value  
46 was selected to determine reference values for adult and under-18 front row players. While  
47 large differences were observed in fatigue endurance values achieved between adult and  
48 under-18 players, the large spread of the data in the adult cohort diluted the significance of  
49 this finding. Though all players achieved a similar time on fatigue assessment, the 50% sub-  
50 maximal load held by the under-18 group (20kg equivalent) was significantly less than the  
51 adult 50% load (25kg equivalent), as a result of their lower peak forces on the maximal  
52 isometric testing. Now that these benchmark data are available, we recommend that future  
53 fatigue endurance assessment of under-18 players should be performed using the mean adult  
54 50% sub-maximal value (25Kg equivalent), which would represent around 60% of the  
55 average under-18 maximal isometric value found in this study. It is likely that greater  
56 differences would be apparent between adults and under-18 groups had we been able to  
57 employ this testing design, and further help discern those able to compete in the adult front  
58  
59  
60

1  
2  
3 row. Future work should also look at assessing 'scrum-specific' fatigue endurance; looking  
4 perhaps at repeated bouts of 80% sub-maximal testing over 10-15 seconds which could be  
5 argued to better reflect the demands of this activity. We suggest this as an area for future  
6 research.  
7

8 Preatoni et al.[2] assessed the forces generated in the scrum by 34 forward packs at 6 different  
9 playing grades (from senior-school to international level) and found notable differences in the  
10 forces generated between schools and senior sides. Worryingly, these authors further reported  
11 that the combined compression and shear forces they recorded in the scrums were of a  
12 sufficient magnitude to induce chronic spine injury. Though further information is needed to  
13 understand the link between mechanical forces in the scrum and injury, the shear forces  
14 recorded are of particular concern as a risk factor for chronic degeneration of the spine  
15 through undesirable rotation and bending motions. The differences in strength characteristics  
16 between adult and under-18 players we describe here suggests that appropriate and specific  
17 training interventions (perhaps through scrum training) are critical in developing the ability  
18 to modulate these forces at an individual level.  
19

20 Perhaps of greater concern is the closed kinetic chain situation of the scrum; where the head is  
21 constrained from moving and loads are applied at both ends. This can lead to a buckling  
22 motion; a process particularly evident in front row forwards when the scrum collapses and the  
23 head strikes the ground. If any single front row player has comparatively weak cervical  
24 extensors, it is reasonable to suggest that this may enhance the risk of scrum collapse. We  
25 suggest that specific training may influence this, thus younger players and perhaps also those  
26 returning from cervical injury are potentially at a competitive disadvantage. For the safety of  
27 all six front row players, it is important to recognize, understand and mitigate the  
28 biomechanical issues that occur in a closed kinetic chain situation where the forces cannot be  
29 vectored away from the spine.  
30

31 A limitation of this study is the speculative link between cervical strength and scrum collapse  
32 and thus injury risk. Although the focus of our investigation was to consider cervical strength  
33 parameters, various other factors such as the speed and direction of force application and  
34 orientation of the head/neck complex are likely to also have a bearing on the ability to  
35 modulate scrum forces. The neutral anatomic position was chosen for strength and fatigue  
36 testing from a safety point of view due to the lack of published data to determine alternative  
37 test design. The validity of this test position as the optimal assessment profile for rugby  
38 cervical testing is unknown. Future work should focus on the influence of head position as to  
39 strength and fatigue values in this context. It must also be recognised that recent changes to  
40 the laws of the game surrounding scrum engagement, depowering the contact forces at the  
41 onset of the scrum and promoting a sustained pushing contest may influence the playing  
42 requirements of the cervical spine of the front rows. It may be that endurance parameters are  
43 now more critical than absolute strength characteristics, though further work is required to  
44 elaborate on any influence to beneficial physical characteristics as a result of this technical  
45 change.  
46

47 In the elite under-18 group assessed, only 2 of 30 players recorded the mean cervical  
48 isometric strength of the adult cohort. Although a few individuals may possess the physical  
49 characteristics (and technical skill) to compete with adult players, our results suggest that  
50 policy should prevent players under the age of 18 playing in the front row of an adult match,  
51 unless specific criteria is met. In contrast to the general schoolboy population, predictive  
52 modelling of cervical strength using alternative physical characteristics was poor. As such,  
53 specific testing would need to be employed to identify those few individuals able to match  
54 their adult counterparts in terms of cervical strength. The concept of a passport to play in the  
55 front row is well established in some countries as a means of ensuring players are  
56 appropriately equipped to cope with the rigours of scrummaging. Objective measures of the  
57  
58  
59  
60

1  
2  
3 individuals' cervical strength profile should be an integral part of any selection process for  
4 players wishing to play in the front row.  
5  
6

## 7 **ACKNOWLEDGEMENTS**

8  
9 We wish to extend thanks to the staff of the Scottish Rugby Union, Prof Jimmy Hutchison  
10 and Mr Richard Nutton who facilitated this work, and to all the players who took part in the  
11 assessments.  
12

## 13 **AUTHOR CONTRIBUTIONS**

14  
15 All authors listed were involved in the study design and data acquisition. DH performed the  
16 analysis and drafted the manuscript. All authors revised and approved the submission.  
17  
18

## 19 **FUNDING STATEMENT**

20  
21 This research received no specific grant from any funding agency in the public, commercial  
22 or not-for-profit sectors'.  
23  
24

## 25 **CONFLICT OF INTEREST**

26  
27 DG has shares in Gatherer Systems who manufacture and supplied the testing equipment used  
28 in this study. The other authors declare no conflict of interest.  
29  
30

## 31 **DATA SHARING STATEMENT**

32  
33 The data are held in a secure database at the University of Edinburgh. Any party wishing to  
34 access unpublished data should discuss with the corresponding author in the first instance.  
35  
36

## 37 **REFERENCES**

- 38  
39 [1]. Palmer-Green DS, Stokes KA, Fuller CW, et al. Match injuries in English youth academy  
40 and schools rugby union: an epidemiological study. *Am J Sports Med*. 2013;41:749-55.  
41  
42 [2]. Preatoni E, Stokes KA, England ME, et al. The influence of playing level on the  
43 biomechanical demands experienced by rugby union forwards during machine scrummaging.  
44 *Scand J Med Sci Sports* 2013;23:178-184  
45  
46 [3]. Brooks JHM, Fuller CW, Kemp SPT, et al. Epidemiology of injuries in English  
47 Professional rugby union: part 1 match injuries. *Br J Sports Med* 2005;39:757-766  
48  
49 [4]. Brooks JHM, Fuller CW, Kemp SPT, et al. Epidemiology of injuries in English  
50 Professional rugby union: part 2 training injuries. *Br J Sports Med* 2005;39:767-775  
51  
52 [5]. MacLean JG, Hutchison JD. Serious neck injuries in U19 rugby union players: an audit of  
53 admissions to spinal injury units in Great Britain and Ireland. *Br J Sports Med* 2012;46:591-4.  
54  
55 [6]. Quarrie KL, Cantu RC, Chalmers DJ. Rugby union injuries to the cervical spine and  
56 spinal cord. *Sports Med* 2002;32:633-53  
57  
58  
59  
60

- 1  
2  
3  
4 [7]. Brown JC, Lambert MI, Verhagen E, et al. The incidence of rugby-related catastrophic  
5 injuries (including cardiac events) in South Africa from 2008 to 2011: a cohort study. *BMJ*  
6 *Open* 2013;3:e002475  
7
- 8 [8]. Brooks JHM, Kemp SPT. Injury-prevention priorities according to playing position in  
9 professional rugby union players *Br J Sports Med* 2011;45:765–775.  
10
- 11 [9]. Gianotti S, Hume PA, Hopkins WG, et al. Interim evaluation of the effect of a new scrum  
12 law on neck and back injuries in rugby union. *Br J Sports Med* 2013;42:427–430  
13
- 14 [10]. Fuller CW, Brooks JH, Kemp SP. Spinal injuries in professional rugby union: a  
15 prospective cohort study. *Clin J Sport Med*. 2007;17:10–6  
16
- 17 [11] Roberts SP, Trewartha G, England M, et al. Collapsed scrums and collision tackles: what  
18 is the injury risk? *Br J Sports Med* [e-pub ahead of print]  
19
- 20 [12]. Scher AT. Rugby injuries to the cervical spine and spinal cord: a 10-year review. *Clin*  
21 *Sports Med*. 1998;17:195–206  
22
- 23 [13]. Viljoen W, Patricios J. BokSmart - implementing a National Rugby Safety Programme.  
24 *Br J Sports Med*. 2012;46:692–3  
25
- 26 [14]. Nutton RW, Hamilton DF, Hutchison JD, et al. Variation in physical development in  
27 schoolboy rugby players: can maturity testing reduce mismatch? *BMJ Open*. 2012;2:e001149  
28
- 29 [15]. Torg J, Ramsey-Emrhein J. Suggested management guidelines for participation in  
30 collision activities with congenital, developmental, or post injury lesions involving the  
31 cervical spine. *Med Sci Sports Exerc*, 1997;29(7):256–272.  
32
- 33 [16]. Hamilton DF, Gatherer D, Jenkins PJ, et al. Age-related differences in the neck strength  
34 of adolescent rugby players: A CROSS-SECTIONAL COHORT STUDY OF SCOTTISH  
35 SCHOOLCHILDREN. *Bone Joint Res* 2012;1:152–7.  
36
- 37 [17]. Gargé's GL, Medina D, Milutinovic L, et al. Normative database of isometric cervical  
38 strength in a healthy population. *Med Sci Sports Exerc* 2002;33:464–70.  
39
- 40 [18]. Jordan A, Mehlsen J, Bullow PM, et al. Maximal isometric strength of the cervical  
41 musculature in 100 healthy volunteers. *Spine* 1999;24:1343–8.  
42
- 43 [19]. Chiu TT, Sing KL. Evaluation of cervical range of motion and isometric neck muscle  
44 strength: reliability and validity. *Clin Rehabil* 2002;16:851–8.  
45
- 46 [20]. Peek K, Gatherer D. The rehabilitation of a professional rugby union player following a  
47 C7/T1 posterior microdiscectomy. *Phys Ther Sport* 2005;6:195–200.  
48
- 49 [21]. Benjamini Y, and Hochberg Y. Controlling the false discovery rate: a practical and  
50 powerful approach to multiple testing. *J. R. Statist. Soc. B* 1995;57, 289–300.  
51
- 52 [22]. Storey JD, "The positive false discovery rate: A Bayesian interpretation and the q-value"  
53 *Annals of Statistics* 2003;31: 2013–2035  
54  
55  
56  
57  
58  
59  
60

## TABLES

**Table 1- Anthropometric data**

|                                     | Under 18     | Adult         | Significance        |
|-------------------------------------|--------------|---------------|---------------------|
| Age (years)                         | 16.7 (16-17) | 27.2 (19-50)  | <0.001 <sup>‡</sup> |
| Experience of the front row (years) | 5.0 (1-12)   | 14.3 (2-26)   | <0.001 <sup>‡</sup> |
| Regular neck strengthening (yes/no) | 7/23         | 5/21          | 0.959 <sup>*</sup>  |
| Height (cm)                         | 178.7 (5.54) | 178.7 (5.91)  | 0.960               |
| Weight (kg)                         | 96.0 (13.69) | 107.8 (13.67) | 0.004 <sup>‡</sup>  |
| Grip strength (kg)                  | 47.8 (5.31)  | 49.56 (7.56)  | 0.360               |
| Cervical Range of Motion (degrees)  |              |               |                     |
| Extension                           | 65.33 (8.70) | 65.62 (6.62)  | 0.895               |
| Flexion                             | 58.50 (8.32) | 44.10 (8.93)  | <0001 <sup>‡</sup>  |
| Side flexion (left)                 | 49.17 (5.88) | 44.33 (6.51)  | 0.010 <sup>‡</sup>  |
| Side flexion (right)                | 45.60 (8.93) | 41.33 (6.18)  | 0.049               |
| Rotation (left)                     | 66.50 (7.67) | 65.90 (6.80)  | 0.772               |
| Rotation (right)                    | 67.83 (8.06) | 64.76 (6.83)  | 0.149               |

Age and experience reported as mean (range), all other variables as mean (SD); <sup>‡</sup> Remains significant at the 0.05 level correcting for multiple testing; <sup>\*</sup>Chi Square

**Table 2 - Cervical strength assessment**

|                         | Under 18             | Adult                | Significance        |
|-------------------------|----------------------|----------------------|---------------------|
| Isometric Strength (kg) |                      |                      |                     |
| Extension               | 41.70 (39.36, 44.18) | 53.70 (48.42, 58.99) | <0.001 <sup>‡</sup> |
| Flexion                 | 22.59 (20.45, 24.72) | 25.40 (22.94, 27.86) | 0.098               |
| Side flexion (left)     | 32.24 (30.04, 34.45) | 40.53 (36.36, 44.71) | 0.002 <sup>‡</sup>  |
| Side flexion (right)    | 31.83 (29.66, 24.01) | 42.48 (39.24, 45.73) | <0.001 <sup>‡</sup> |
| Fatigue                 |                      |                      |                     |
| Total (kg.sec)          | 1305 (1181, 1429)    | 1551 (1332, 1770)    | 0.058               |
| Time achieved (sec)     | 67.10 (60.44, 83.17) | 71.81 (62.96, 71.28) | 0.390               |
| Average load (kg)       | 18.25 (16.77, 19.73) | 23.54 (21.35, 25.73) | <0.001 <sup>‡</sup> |

All data reported as mean (95% CI). <sup>‡</sup> Remains significant at the 0.05 level correcting for multiple testing

**Table 3 – Multivariate predictive modelling of isometric neck extension (R<sup>2</sup>=0.31)**

| Predictor | Co-efficient | P value |
|-----------|--------------|---------|
|-----------|--------------|---------|

---

|                      |      |       |
|----------------------|------|-------|
| Front row experience | 0.63 | 0.035 |
| Weight               | 0.22 | 0.003 |

---

Front row experience is the primary predictor variable explaining 22% of the total variation, adding weight as a predictor determines the best fit model (displayed above). Other variations offer less than 1% additional enhanced explanatory power with the limitation of comprising more predictor variables and were thus discounted.

For peer review only

1  
2  
3  
4  
5  
6  
7  
8  
9  
10  
11  
12  
13  
14  
15  
16  
17  
18  
19  
20  
21  
22  
23  
24  
25  
26  
27  
28  
29  
30  
31  
32  
33  
34  
35  
36  
37  
38  
39  
40  
41  
42  
43  
44  
45  
46  
47  
48  
49  
50  
51  
52  
53  
54  
55  
56  
57  
58  
59  
60

**FIGURE LEGEND**

**Figure 1 - Differences in cervical strength by group**

**Figure 2 – Strong relationship between cervical strength and playing experience**

**Figure 3 – Weak relationship between grip strength and cervical strength**

For peer review only



1  
2  
3 **Comparative cervical profiles of adult and under-18 front row rugby players:**  
4 **implications for playing policy.**  
5  
6  
7

8 Hamilton DF<sup>1</sup>, Gatherer D<sup>2</sup>, Robson J<sup>3</sup>, Rennie N<sup>3</sup>, Graham N<sup>3</sup>, Maclean JGB<sup>4</sup>, Simpson  
9 AHRW<sup>1</sup>  
10

11  
12  
13 **Authors Institutions:**  
14

- 15 1. Department of Trauma and Orthopaedics, University of Edinburgh, Edinburgh, UK  
16 2. Gatherer Ltd, Aylesbury, UK  
17 3. Scottish Rugby Union, Edinburgh, UK  
18 4. Department of Orthopaedics, Perth Royal Infirmary, Perth, UK  
19  
20  
21

22 **Corresponding Author:**  
23

24 David Hamilton PhD  
25 Department of Trauma and Orthopaedics  
26 Chancellor's Building,  
27 49 Little France Crescent  
28 University of Edinburgh  
29 EH16 4SB  
30

31 E-mail: d.f.hamilton@ed.ac.uk  
32 tel: 0131 242 6297  
33 fax: 0131 242 6534  
34  
35

36 **KEY WORDS**  
37

38 Rugby; neck, injury, strength  
39  
40

41 **WORD COUNT**  
42

43 2665  
44  
45  
46  
47  
48  
49  
50  
51  
52  
53  
54  
55  
56  
57  
58  
59  
60

**ABSTRACT**

**Objectives:** To compare the cervical isometric strength, fatigue endurance and range of motion of adult and under-18 age grade front row rugby players to inform the development of a safe age group policy with particular reference to scrummaging.

**Design:** Cross-sectional cohort study.

**Setting:** 'Field testing' at Murrayfield stadium.

**Participants:** 30 high performance under-18 players and 21 adult front row rugby players

**Outcome measures:** Isometric neck strength, height, weight and grip strength.

**Results:** Youth players demonstrated the same height and grip strength as the adult players; however the adults were significantly heavier and demonstrated substantially greater isometric strength ( $p < 0.001$ ). Only 2 of the 'elite' younger players could match the adult mean cervical isometric strength value. In contrast to school age players in general, grip strength was poorly associated with neck strength ( $r=0.2$ ) in front row players; instead player weight ( $r=0.4$ ) and the number of years' experience of playing in the front row ( $r=0.5$ ) were the only relevant factor in multivariate modelling of cervical strength ( $R^2=0.3$ ).

**Conclusions:** Extreme forces are generated between opposing front rows in the scrum and avoidance of mismatch is important if the risk of injury is to be minimised. Although elite youth front row rugby players demonstrate the same peripheral strength as their adult counterparts on grip testing, the adults demonstrate significantly greater cervical strength. If older youths and adults are to play together, such findings have to be noted in the development of age group policies with particular reference to the scrum.

## ARTICLE SUMMARY

### Key Findings

Front row rugby players under the age of 18 cannot resist the same cervical loads as adult front row players.

In contrast to general findings on youth players, predictive modelling of cervical strength by proxy measures in this specific group is poor and direct testing is required.

This is directly relevant to age related playing policy for under-18s competing in the front row in the adult game as appropriate neck strength is likely to be paramount important into preventing scrum collapse and the associated injuries.

Age related playing policy should reflect both generic and position specific physical ability

### Strengths and Limitations

A particular strength of this study is the direct physical cervical testing of representative player cohorts, and the novel data presented.

A limitation is the assumed though unsubstantiated link between cervical strength and injury; though this is mitigated in this specific context through the known link between scrum collapse and cervical injury.

## INTRODUCTION

Rugby is the world's most popular contact, or more appropriately collision, sport and carries an injury risk four times greater than semi-contact sports such as football/soccer.[1] The scrum is an iconic and fundamental part of the game, where two 'forward packs' compete for the ball to restart the game following a minor infringement. It is a test of strength and technique where the cervical spine of the opposing front rows are subjected to huge compressive and shear forces of a sufficient magnitude to result in tissue injury[2] and structural failure.

Around 8% of all injuries in professional rugby are thought to result from the scrum,[3, 4] and rates in amateur and youth rugby are thought to be similarly proportioned. Though this number is comparatively small, these injuries are likely to be of greater severity and involve the spine.[5] Despite a typical match consisting of comparatively few scrums (compared to other contact events, such as tackles), around 40% of all rugby derived acute spinal cord injuries occur in the scrum.[6, 7] Scrum engagement occurs as the head and shoulders of the competing front rows make forceful contact. This is thought to be a particular risk factor for injury, through high compressive and shear loads or hyperflexion of the cervical spine.[6-8] This risk has been somewhat mitigated in recent years by the introduction of 'controlled scrum engagement' where the distance between opposing front rows has been standardised in attempt to reduce acceleration and thus collision forces.[9, 10] Collapsing of the scrum has also been identified as a leading cause of scrum related injury.[6, 11] Premature micro trauma induced degeneration of the cervical spine in front row players[12] and mismatches in size between front row players[6, 13] have been suggested as potential factors for the over-representation of scrum-related injuries, though Brown et al.[7] note that coaching and technical factors have not been well explored in these analyses.

Body size and physical mismatch are considered (at least in part) to be associated to injury risk in schoolboy rugby.[14] Some national governing bodies have introduced a weight category banding for youth rugby to address this concern in children who mature skeletally at differing rates. However once players reach the age of 18 all participants are considered as adults and no such segregation takes place, indeed rugby is a sport that relies on differing physical attributes for the various playing positions. There are circumstances though where those yet to reach their 18<sup>th</sup> birthday may wish to play adult rugby, either through selection processes in the case of particularly gifted players, or through leaving school and joining a club playing in the adult leagues. Policy within Scottish Rugby (prior to the start of the 2013-2014 season) had been that only 'exceptional' 17 year-old players were eligible to play in the adult leagues however there was concern as to the suitability of this policy regarding the front row.

The scrum exposes player's cervical spines to potentially injurious forces that must be attenuated by controlled spinal motion through the cervical musculature, ligaments and intervertebral discs.[15] Appropriate strength of the cervical musculature is thus particularly important for front row players. We have previously demonstrated large variation in the neck strength of school-aged rugby players,[16] however we are not aware of any report of data specific to the front row forwards (either youth or adult).

The aim of this study was to assess the cervical isometric strength and fatigue endurance of both adult and senior school-aged rugby players to assess the ability of under 18 players to compete with adults in the front row of the scrum. A secondary objective was to assess the relationship between isometric strength, and various other physical parameters previously shown to predict this.

## METHODS

### Study design and population

A cross-sectional cohort study was undertaken to investigate the isometric neck strength and fatigue endurance of front row rugby players. 30 senior school-aged players (under-18 age-grade) were assessed at a Scottish Rugby Union (SRU) training day, and 22 adult players in a separate assessment, again organised in conjunction with the SRU.

The youth players were drawn from 21 different clubs/schools from across Scotland and represented the 'elite' end of the senior school-aged front row players in Scotland. The adults were a representative sample of amateur players, drawn from 6 clubs reflecting the top 5 playing levels in Scottish club rugby (as defined by the position of their first XV in the Scottish national leagues). [This range was decided upon to reflect the spectrum of levels that the under-18 group may play.](#) Players were assessed from Dunfermline, Heriots, Murrayfield Wanderers, Musselburgh, Royal High Corstorphine, and Watsonian rugby clubs, comprising players from 1<sup>st</sup>, 2<sup>nd</sup> and 3<sup>rd</sup> teams. Both adult and school-age testing sessions took place at the same facility in Murrayfield stadium in the same environment using the same equipment and operators. Participation was voluntary and signed consent was obtained from all participants. Regional Ethics Committee approval was received for this study.

### Cervical strength and endurance assessment

Isometric cervical muscle testing is well validated.[\[176-198\]](#) We assessed maximal voluntary isometric cervical muscle strength with the GS Gatherer and GS Analysis Suite (Gatherer Systems Ltd, Aylesbury); a custom-built device based on a 300Kg load cell and bespoke software system.

The test was performed employing a previously reported protocol[\[165, 2019\]](#) where the head was placed in the neutral anatomic position and subjected to manual controlled incremental loading to positional failure (the point of head movement). Subject report of pain or neurological symptoms also stopped the test. Loading was applied and data was recorded at 20Hz. Peak isometric force generated by the musculature was defined as the maximal load recorded during the test procedure. An average of 3 tests is reported, [with a 60 second rest period enforced between assessments.](#)

An assessment of cervical musculature fatigue endurance was made using the same test equipment. The player was required to exert an isometric extension load at 50% of their recorded mean peak extension force for as long as possible. The player sat in a neutral position with their arms by their side and head connected to the load cell. Players received visual graphical feedback as to the target load applied via a computer monitor. This allowed for maintenance of a consistent load until failure. A single assessment was made of fatigue.

### Anthropometric parameters

Additional measures were made of; height (Leicester Height Measure; SECA, UK), weight (medical grade mechanical flat scales; SECA, UK), grip strength (JAMAR hydraulic hand dynamometer; Sammons Preston, Illinois, USA) and cervical range of motion (Cervical Range of Motion Instrument, Performance Attainment Associates, Minnesota, USA). 3 readings were obtained for each parameter and their average was derived and reported. Demographic data and a self-report questionnaire to determine the individual's rugby playing history and details of neck specific training and injuries were completed by the participants prior to physical assessment.

### Data analysis

Data were analysed using Minitab (Version 16). Data were checked for normality and are reported as means with standard deviation [or 95% confidence intervals of the mean](#) as a measure of dispersion. Independent samples t-tests were used to assess differences in

continuous variables between groups unless otherwise stated. Significance was accepted as  $p < 0.05$  incorporating the Benjami-Hochberg correction for the testing of multiple hypotheses, to reduce the possibility of making a type II error in the interpretation of results.<sup>[210, 22+]</sup>

To assess the secondary research question as to predictive modelling of front row player neck strength all data was considered as a single cohort. Pearson correlation coefficients are reported for bivariate correlations. ~~Pearson correlation coefficients are reported for bivariate correlations.~~ ~~Multivariate~~ Stepwise regression modelling was performed to achieve the most predictive model for global neck strength (for which we use isometric extension) utilising the fewest variables. Predictive variables were selected with a significance of  $p < 0.1$  to accommodate the possibility of variables achieving statistical significance once the confounding influence of additional variables was controlled. A potential limitation of this approach is that the homogenised under-18 group may cause a clustering effect in the data. Separate analysis of the adult data demonstrates the same relationships as reported for the entire cohort lending credibility to the results presented. Further, all players assessed are eligible to play in the adult leagues and can thus be considered representative of a single cohort in the context of our secondary research question: to assess the influence of various physical variables (previously suggested to reflect the variation in cervical strength in a school aged population) in the specific situation of the front row player.

## RESULTS

As expected, large differences were observed between groups in terms of age and experience (years) playing as a front row forward. There was no difference in height or grip strength between the groups, though the adults were significantly heavier. Cervical range of motion was similar in measures of extension and rotation, though the elite under-18 group had a greater range of cervical flexion and ~~rotation-side flexion~~ (table 1).

Substantial differences were observed in isometric strength between groups in extension (figure 1, table 2) and side flexion (table 2); the under 18 group approximately 20% weaker than the adult group. A larger variation was seen in all parameters of adult neck strength data compared to the under 18 group. This may be due to the selection bias of elite players in the younger age group, which may have somewhat homogenised this data. Despite this potential positive skew in the under-18 data, only 2 of the 30 elite under-18 front row players achieved the adult mean strength value (figure 12).

Only 3 of the under-18s achieved the adult mean isometric extension fatigue endurance (~~total work impulse, figure 1~~ table 2), this difference between groups was significant at  $p < 0.1$ , possibly reflecting the large variation in adult scores. The adults performed better in the fatigue assessment, holding significantly higher average loads for the same length of time as the younger players (table 2). Surprisingly, only a quarter of all players reported performing routine neck exercises; split evenly between groups (table 1).

### Predictive modelling:

Isometric neck strength was most associated with the experience of playing in the front row ( $r=0.5$ ,  $p<0.001$ ) (Figure 2), followed by weight ( $r=0.4$ ,  $p=0.004$ ) and player age ( $r=0.4$ ,  $p=0.005$ ). In contrast, grip strength correlated relatively poorly ( $r=0.2$ ,  $p=0.09$ ) (figure 3). Cervical fatigue endurance was associated with peak isometric extension strength but correlated poorly ( $r=0.30$ ,  $p=0.08$ ). Player weight ( $r=0.6$ ,  $p=0.007$ ) was the factor most associated with fatigue, again grip strength correlated poorly ( $r=0.1$ ,  $p=0.6$ ).

Multivariate Stepwise regression found determined the best predictive model for isometric strength to include the number of years' experience playing in the front row and the players' weight (table 3). The greatest single contributing variable was the experience of playing in the

1  
2  
3 | [front row, which explained around 22% of the variation in isometric extension.](#) The same  
4 variables also created the best predictive model of fatigue endurance, again explaining around  
5 a third of the variation in neck strength ( $R^2=0.4$ ).  
6  
7

## 8 DISCUSSION

9  
10 This study demonstrates that even elite under-18 front row rugby players, who have  
11 participated in a conditioning and strengthening programme, are able to generate significantly  
12 less cervical muscle force than their adult equivalents. This is highly relevant in determining  
13 the suitability of such players to compete in the adult game, where significant forces are  
14 exerted through the cervical spine of the front row forwards during the scrum. These forces  
15 must be modulated by the cervical musculature, and the reduced isometric strength and  
16 fatigue endurance ratings found in the under-18 players puts them at a significant  
17 disadvantage, with potentially injurious consequences. A particular concern is that the under-  
18 18 players evaluated in this study contained a selection bias of high performance age-grade  
19 players. While this group represents the players most likely to be considered appropriate to  
20 play in the adult leagues, it is also likely that they are bigger and stronger than their age-grade  
21 counterparts, suggesting that the actual difference between the adult and under-18 values in  
22 the wider population may be much greater.  
23

24 Little information is available as to the 'neck strength' of rugby players, either adult or  
25 school-aged. We previously assessed the cervical isometric strength of Scottish school  
26 children between the ages of 13 and 18 and found huge variation both within and between  
27 year groups.[165] We are not aware of any other comparable data for adult players or of any  
28 study specifically investigating the cervical isometric strength of the front row forwards.  
29 Using multivariate techniques, we previously reported that player age, weight and grip  
30 strength (as an objective measure of overall strength) was strongly predictive of isometric  
31 neck extension strength in the general school-aged rugby playing population; explaining  
32 around two thirds of the variance in cervical strength. Interestingly in this analysis, the  
33 measure of grip strength was not a strong predictor of cervical strength in this specific group  
34 of front-row players, where player weight and number of years of experience of playing in the  
35 front row were the most important factors. This finding may be a reflection of the general lack  
36 of neck specific training performed among rugby players. It is likely that for most people  
37 scrummaging is the main source of cervical strength training and this is supported by the  
38 finding that only a quarter of the players assessed reported performing regular exercises for  
39 the neck. We propose that the elite under-18 players had reached the same global strength as  
40 their adult counterparts through peripheral strength training; however in the absence of  
41 specific structured conditioning, they could not match the cervical strength the adults had  
42 gained as a result of years of competitive scrummaging.  
43  
44

45 This is to our knowledge the first report of a cervical musculature fatigue endurance  
46 assessment in front row rugby players of any age. In the absence of previous data, it was  
47 necessary to set a safe threshold at which to perform the test, thus the 50% sub-maximal value  
48 was selected to determine reference values for adult and under-18 front row players. While  
49 large differences were observed in fatigue endurance values achieved between adult and  
50 under-18 players, the large spread of the data in the adult cohort diluted the significance of  
51 this finding. Though all players achieved a similar time on fatigue assessment, the 50% sub-  
52 maximal load held by the under-18 group (20kg equivalent) was significantly less than the  
53 adult 50% load (25kg equivalent), as a result of their lower peak forces on the maximal  
54 isometric testing. Now that these benchmark data are available, we recommend that future  
55 fatigue endurance assessment of under-18 players should be performed using the mean adult  
56 50% sub-maximal value (25Kg equivalent), which would represent around 60% of the  
57 average under-18 maximal isometric value found in this study. It is likely that greater  
58 differences would be apparent between adults and under-18 groups had we been able to  
59  
60

1  
2  
3 employ this testing design, and further help discern those able to compete in the adult front  
4 row. Future work should also look at assessing 'scrum-specific' fatigue endurance; looking  
5 perhaps at repeated bouts of 80% sub-maximal testing over 10-15 seconds which [could be](#)  
6 [argued to](#) better reflects the demands of this activity. [We suggest this as an area for future](#)  
7 [research.](#)

8  
9 Preatoni et al.[2] assessed the forces generated in the scrum by 34 forward packs at 6 different  
10 playing grades (from senior-school to international level) and found notable differences in the  
11 forces generated between schools and senior sides. Worryingly, these authors further reported  
12 that the combined compression and shear forces they recorded in the scrums were of a  
13 sufficient magnitude to induce chronic spine injury. Though further information is needed to  
14 understand the link between mechanical forces in the scrum and injury, the shear forces  
15 recorded are of particular concern as a risk factor for chronic degeneration of the spine  
16 through undesirable rotation and bending motions. [The differences in strength characteristics](#)  
17 [between adult and under-18 players we describe here suggests that appropriate and specific](#)  
18 [training interventions \(perhaps through scrum training\) are critical in developing the ability](#)  
19 [modulate these forces at an individual level.](#)

20  
21 Perhaps of greater concern is the closed kinetic chain situation of the scrum; where the head is  
22 constrained from moving and loads are applied at both ends. This can lead to a buckling  
23 motion; a process particularly evident in front row forwards when the scrum collapses and the  
24 head strikes the ground. If any single front row player has [comparatively](#) weak cervical  
25 extensors, it is reasonable to suggest that this may enhance the risk of scrum collapse. [We](#)  
26 [suggest that specific training may influence this, thus younger players and perhaps also those](#)  
27 [returning from cervical injury are potentially at a competitive disadvantage.](#) For the safety of  
28 all six front row players, it is important to recognize, understand and mitigate the  
29 biomechanical issues that occur in a closed kinetic chain situation where the forces cannot be  
30 vectored away from the spine.

31  
32 [A limitation of this study is the speculative link between cervical strength and scrum collapse](#)  
33 [and thus injury risk. Although the focus of our investigation was to consider cervical strength](#)  
34 [parameters, various other factors such as the speed and direction of force application and](#)  
35 [orientation of the head/neck complex are likely to also have a bearing on the ability to](#)  
36 [modulate scrum forces. The neutral anatomic position was chosen for strength and fatigue](#)  
37 [testing from a safety point of view due to the lack of published data to determine alternative](#)  
38 [test design. The validity of this test position as the optimal assessment profile for rugby](#)  
39 [cervical testing is unknown. Future work should focus on the influence of head position as to](#)  
40 [strength and fatigue values in this context. It must also be recognised that recent changes to](#)  
41 [the laws of the game surrounding scrum engagement, depowering the contact forces at the](#)  
42 [onset of the scrum and promoting a sustained pushing contest may influence the playing](#)  
43 [requirements of the cervical spine of the front rows. It may be that endurance parameters are](#)  
44 [now more critical than absolute strength characteristics, though further work is required to](#)  
45 [elaborate on any influence to beneficial physical characteristics as a result of this technical](#)  
46 [change.](#)

47  
48  
49 In the elite under-18 group assessed, only 2 of 30 players recorded the mean cervical  
50 isometric strength of the adult cohort. Although a few individuals may possess the physical  
51 characteristics (and technical skill) to compete with adult players, our results suggest that  
52 policy should prevent players under the age of 18 playing in the front row of an adult match,  
53 unless specific criteria is met. In contrast to the general schoolboy population, predictive  
54 modelling of cervical strength using alternative physical characteristics was poor. As such,  
55 specific testing would need to be employed to identify those few individuals able to match  
56 their adult counterparts in terms of cervical strength. The concept of a passport to play in the  
57 front row is well established in some countries as a means of ensuring players are  
58 appropriately equipped to cope with the rigours of scrummaging. Objective measures of the  
59  
60



1  
2  
3 individuals' cervical strength profile should be an integral part of any selection process for  
4 players wishing to play in the front row.  
5  
6

## 7 **ACKNOWLEDGEMENTS**

8  
9 We wish to extend thanks to the staff of the Scottish Rugby Union, Prof Jimmy Hutchison  
10 and Mr Richard Nutton who facilitated this work, and to all the players who took part in the  
11 assessments.  
12

## 13 **AUTHOR CONTRIBUTIONS**

14  
15 All authors listed were involved in the study design and data acquisition. DH performed the  
16 analysis and drafted the manuscript. All authors revised and approved the submission.  
17  
18

## 19 **FUNDING STATEMENT**

20  
21 This research received no specific grant from any funding agency in the public, commercial  
22 or not-for-profit sectors?  
23  
24

## 25 **CONFLICT OF INTEREST**

26  
27 DG has shares in Gatherer Systems who manufacture and supplied the testing equipment used  
28 in this study. The other authors declare no conflict of interest.  
29  
30

## 31 **DATA SHARING STATEMENT**

32  
33 The data are held in a secure database at the University of Edinburgh. Any party wishing to  
34 access unpublished data should discuss with the corresponding author in the first instance.  
35  
36

## 37 **REFERENCES**

- 38  
39 [1]. Palmer-Green DS, Stokes KA, Fuller CW, et al. Match injuries in English youth academy  
40 and schools rugby union: an epidemiological study. *Am J Sports Med.* 2013;41:749-55.  
41  
42 [2]. Preatoni E, Stokes KA, England ME, et al. The influence of playing level on the  
43 biomechanical demands experienced by rugby union forwards during machine scrummaging.  
44 *Scand J Med Sci Sports* 2013;23:178-184  
45  
46 [3]. Brooks JHM, Fuller CW, Kemp SPT, et al. Epidemiology of injuries in English  
47 Professional rugby union: part 1 match injuries. *Br J Sports Med* 2005;39:757-766  
48  
49 [4]. Brooks JHM, Fuller CW, Kemp SPT, et al. Epidemiology of injuries in English  
50 Professional rugby union: part 2 training injuries. *Br J Sports Med* 2005;39:767-775  
51  
52 [5]. MacLean JG, Hutchison JD. Serious neck injuries in U19 rugby union players: an audit of  
53 admissions to spinal injury units in Great Britain and Ireland. *Br J Sports Med* 2012;46:591-4.  
54  
55 [6]. Quarrie KL, Cantu RC, Chalmers DJ. Rugby union injuries to the cervical spine and  
56 spinal cord. *Sports Med* 2002;32:633-53  
57  
58  
59  
60

- 1  
2  
3  
4 [7]. Brown JC, Lambert MI, Verhagen E, et al. The incidence of rugby-related catastrophic  
5 injuries (including cardiac events) in South Africa from 2008 to 2011: a cohort study. *BMJ*  
6 *open* 2013;3:e002475
- 7  
8 [8]. Brooks JHM, Kemp SPT. Injury-prevention priorities according to playing position in  
9 professional rugby union players *Br J Sports Med* 2011;45:765–775.
- 10  
11 [9]. Gianotti S, Hume PA, Hopkins WG, et al. Interim evaluation of the effect of a new scrum  
12 law on neck and back injuries in rugby union. *Br J Sports Med* 2013;42:427–430
- 13  
14 [10]. Fuller CW, Brooks JH, Kemp SP. Spinal injuries in professional rugby union: a  
15 prospective cohort study. *Clin J Sport Med*. 2007;17:10–6
- 16  
17 [\[11\] Roberts SP, Trewartha G, England M, et al. Collapsed scrums and collision tackles: what  
18 is the injury risk? \*Br J Sports Med\* \[e-pub ahead of print\]](#)
- 19  
20 [124]. Scher AT. Rugby injuries to the cervical spine and spinal cord: a 10-year review. *Clin*  
21 *Sports Med*. 1998;17:195–206
- 22  
23 [132]. Viljoen W, Patricios J. BokSmart - implementing a National Rugby Safety Programme.  
24 *Br J Sports Med*. 2012;46:692–3
- 25  
26 [143]. Nutton RW, Hamilton DF, Hutchison JD, et al. Variation in physical development in  
27 schoolboy rugby players: can maturity testing reduce mismatch? *BMJ Open*. 2012;2:e001149
- 28  
29 [154]. Torg J, Ramsey-Emrhein J. Suggested management guidelines for participation in  
30 collision activities with congenital, developmental, or post injury lesions involving the  
31 cervical spine. *Med Sci Sports Exerc*, 1997;29(7):256–272.
- 32  
33 [165]. Hamilton DF, Gatherer D, Jenkins PJ, et al. Age-related differences in the neck  
34 strength of adolescent rugby players: A CROSS-SECTIONAL COHORT STUDY OF  
35 SCOTTISH SCHOOLCHILDREN. *Bone Joint Res* 2012;1:152–7.
- 36  
37 [176]. Gargè's GL, Medina D, Milutinovic L, et al. Normative database of isometric cervical  
38 strength in a healthy population. *Med Sci Sports Exerc* 2002;33:464–70.
- 39  
40 [187]. Jordan A, Mehlsen J, Bu'low PM, et al. Maximal isometric strength of the cervical  
41 musculature in 100 healthy volunteers. *Spine* 1999;24:1343–8.
- 42  
43 [198]. Chiu TT, Sing KL. Evaluation of cervical range of motion and isometric neck muscle  
44 strength: reliability and validity. *Clin Rehabil* 2002;16:851–8.
- 45  
46 [2049]. Peek K, Gatherer D. The rehabilitation of a professional rugby union player following  
47 a C7/T1 posterior microdiscectomy. *Phys Ther Sport* 2005;6:195–200.
- 48  
49 [210]. Benjamini Y, and Hochberg Y. Controlling the false discovery rate: a practical and  
50 powerful approach to multiple testing. *J. R. Statist. Soc. B* 1995;57, 289–300.
- 51  
52 [224]. Storey JD, "The positive false discovery rate: A Bayesian interpretation and the q-  
53 value" *Annals of Statistics* 2003;31: 2013–2035
- 54  
55  
56  
57  
58  
59  
60

## TABLES

Table 1- Anthropometric data

|                                     | Under 18     | Adult         | Significance        |
|-------------------------------------|--------------|---------------|---------------------|
| Age (years)                         | 16.7 (16-17) | 27.2 (19-50)  | <0.001 <sup>‡</sup> |
| Experience of the front row (years) | 5.0 (1-12)   | 14.3 (2-26)   | <0.001 <sup>‡</sup> |
| Regular neck strengthening (yes/no) | 7/23         | 5/21          | 0.959 <sup>*</sup>  |
| Height (cm)                         | 178.7 (5.54) | 178.7 (5.91)  | 0.960               |
| Weight (kg)                         | 96.0 (13.69) | 107.8 (13.67) | 0.004 <sup>‡</sup>  |
| Grip strength (kg)                  | 47.8 (5.31)  | 49.56 (7.56)  | 0.360               |
| Cervical Range of Motion (degrees)  |              |               |                     |
| Extension                           | 65.33 (8.70) | 65.62 (6.62)  | 0.895               |
| Flexion                             | 58.50 (8.32) | 44.10 (8.93)  | <0001 <sup>‡</sup>  |
| Side flexion (left)                 | 49.17 (5.88) | 44.33 (6.51)  | 0.010 <sup>‡</sup>  |
| Side flexion (right)                | 45.60 (8.93) | 41.33 (6.18)  | 0.049               |
| Rotation (left)                     | 66.50 (7.67) | 65.90 (6.80)  | 0.772               |
| Rotation (right)                    | 67.83 (8.06) | 64.76 (6.83)  | 0.149               |

Age and experience reported as mean (range), all other variables as mean (SD); <sup>‡</sup> Remains significant at the 0.05 level correcting for multiple testing; <sup>\*</sup> Chi Square

Table 2 - Cervical strength assessment

|                         | Under 18                  | Adult                     | Significance        |
|-------------------------|---------------------------|---------------------------|---------------------|
| Isometric Strength (kg) |                           |                           |                     |
| Extension               | 41.70 (39.36, 44.186-74)  | 53.70 (48.42, 58.9942-36) | <0.001 <sup>‡</sup> |
| Flexion                 | 22.59 (20.45, 24.725-96)  | 25.40 (22.94, 27.865-76)  | 0.098               |
| Side flexion (left)     | 32.24 (30.04, 34.456-16)  | 40.53 (36.36, 44.719-76)  | 0.002 <sup>‡</sup>  |
| Side flexion (right)    | 31.83 (29.66, 24.016-08)  | 42.48 (39.24, 45.737-59)  | <0.001 <sup>‡</sup> |
| Fatigue                 |                           |                           |                     |
| Total (kg./sec)         | 1305 (1181, 1429236.8)    | 1551 (1332, 1770512)      | 0.058               |
| Time achieved (sec)     | 67.10 (60.44, 83.1721-67) | 71.81 (62.96, 71.289-73)  | 0.390               |
| Average load (kg)       | 18.25 (16.77, 19.732-82)  | 23.54 (21.35, 25.735-13)  | <0.001 <sup>‡</sup> |

All data reported as mean (95% CI/SD). <sup>‡</sup> Remains significant at the 0.05 level correcting for multiple testing

Table 3 – Multivariate predictive modelling of isometric neck extension (R<sup>2</sup>=0.31)

| Predictor | Co-efficient | P value |
|-----------|--------------|---------|
|-----------|--------------|---------|

1  
2  
3  
4  
5  
6  
7  
8  
9  
10  
11  
12  
13  
14  
15  
16  
17  
18  
19  
20  
21  
22  
23  
24  
25  
26  
27  
28  
29  
30  
31  
32  
33  
34  
35  
36  
37  
38  
39  
40  
41  
42  
43  
44  
45  
46  
47  
48  
49  
50  
51  
52  
53  
54  
55  
56  
57  
58  
59  
60

---

|                      |      |       |
|----------------------|------|-------|
| Front row experience | 0.63 | 0.035 |
| Weight               | 0.22 | 0.003 |

Front row experience is the primary predictor variable explaining 22% of the total variation, adding weight as a predictor determines the best fit model (displayed above). Other variations offer less than 1% additional enhanced explanatory power with the limitation of comprising more predictor variables and were thus discounted.

For peer review only

1  
2  
3 **FIGURE LEGEND**  
4

5  
6 **Figure 1 - Differences in cervical strength by group**  
7

8  
9 **Figure 2 – Strong relationship between cervical strength and playing experience**  
10

11  
12 **Figure 3 – Weak relationship between grip strength and cervical strength**  
13

14  
15  
16  
17  
18  
19  
20  
21  
22  
23  
24  
25  
26  
27  
28  
29  
30  
31  
32  
33  
34  
35  
36  
37  
38  
39  
40  
41  
42  
43  
44  
45  
46  
47  
48  
49  
50  
51  
52  
53  
54  
55  
56  
57  
58  
59  
60

For peer review only

1  
2  
3  
4  
5  
6  
7  
8  
9  
10  
11  
12  
13  
14  
15  
16  
17  
18  
19  
20  
21  
22  
23  
24  
25  
26  
27  
28  
29  
30  
31  
32  
33  
34  
35  
36  
37  
38  
39  
40  
41  
42  
43  
44  
45  
46  
47  
48  
49  
50  
51  
52  
53  
54  
55  
56  
57  
58  
59  
60

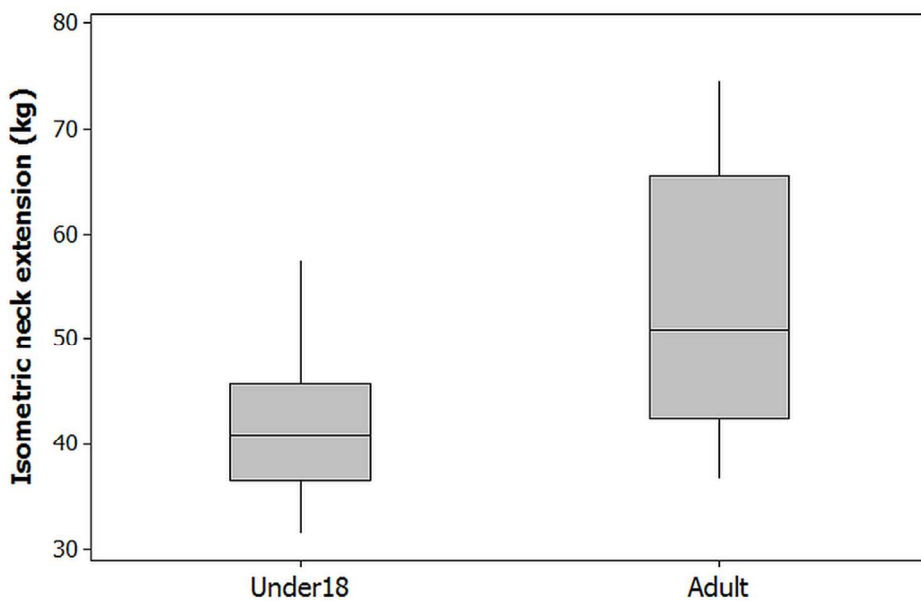

Differences in cervical isometric extension  
90x59mm (300 x 300 DPI)

Review only

1  
2  
3  
4  
5  
6  
7  
8  
9  
10  
11  
12  
13  
14  
15  
16  
17  
18  
19  
20  
21  
22  
23  
24  
25  
26  
27  
28  
29  
30  
31  
32  
33  
34  
35  
36  
37  
38  
39  
40  
41  
42  
43  
44  
45  
46  
47  
48  
49  
50  
51  
52  
53  
54  
55  
56  
57  
58  
59  
60

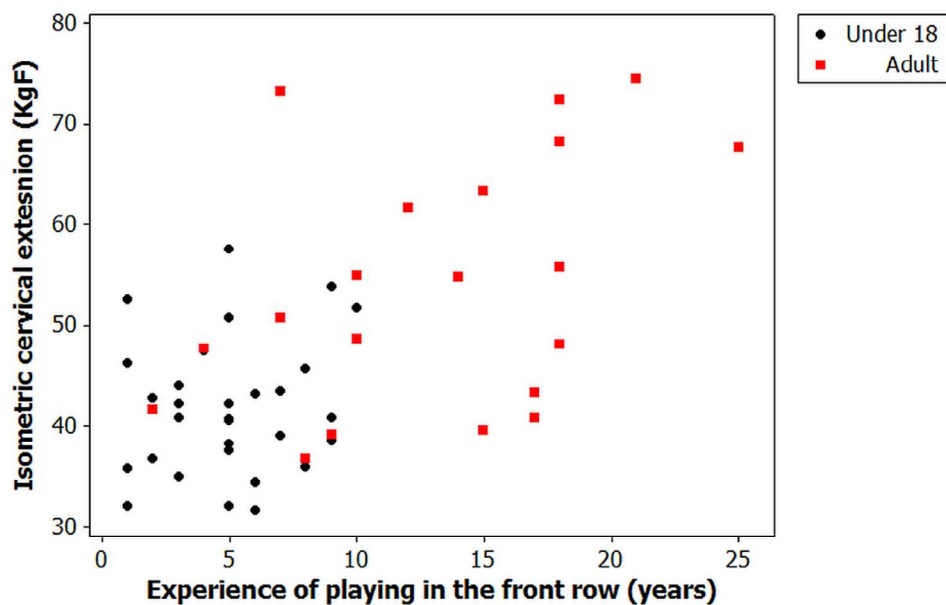

Strong relationship between cervical strength and playing experience  
90x60mm (300 x 300 DPI)

Review only

1  
2  
3  
4  
5  
6  
7  
8  
9  
10  
11  
12  
13  
14  
15  
16  
17  
18  
19  
20  
21  
22  
23  
24  
25  
26  
27  
28  
29  
30  
31  
32  
33  
34  
35  
36  
37  
38  
39  
40  
41  
42  
43  
44  
45  
46  
47  
48  
49  
50  
51  
52  
53  
54  
55  
56  
57  
58  
59  
60

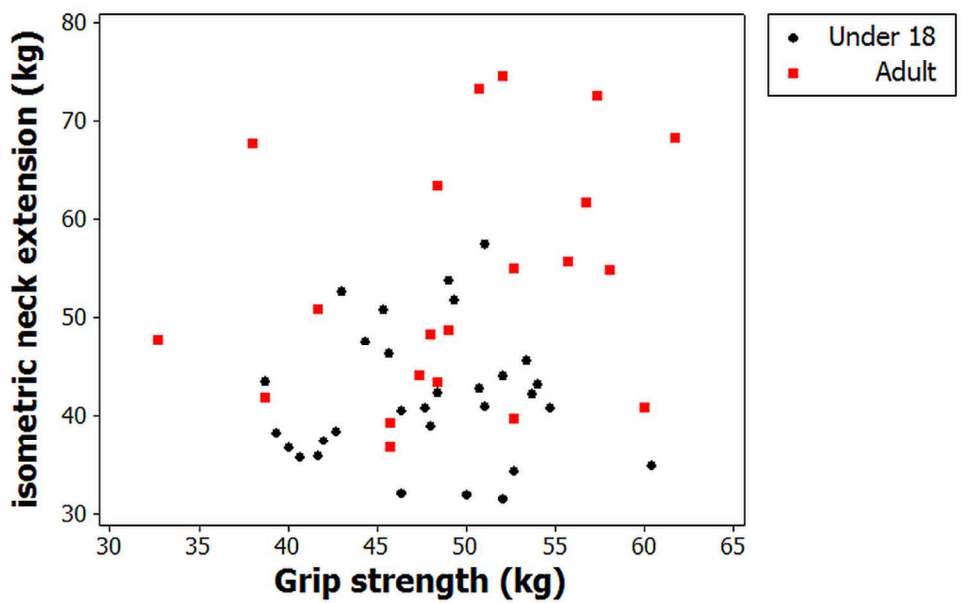

Weak relationship between grip strength and cervical strength  
90x59mm (300 x 300 DPI)

Review only



STROBE 2007 (v4) Statement—Checklist of items that should be included in reports of *cohort studies*

| Section/Topic                | Item # | Recommendation                                                                                                                                                                       | Reported on page # |
|------------------------------|--------|--------------------------------------------------------------------------------------------------------------------------------------------------------------------------------------|--------------------|
| Title and abstract           | 1      | (a) Indicate the study's design with a commonly used term in the title or the abstract                                                                                               | 2                  |
|                              |        | (b) Provide in the abstract an informative and balanced summary of what was done and what was found                                                                                  | 2                  |
| <b>Introduction</b>          |        |                                                                                                                                                                                      |                    |
| Background/rationale         | 2      | Explain the scientific background and rationale for the investigation being reported                                                                                                 | 3                  |
| Objectives                   | 3      | State specific objectives, including any prespecified hypotheses                                                                                                                     | 3                  |
| <b>Methods</b>               |        |                                                                                                                                                                                      |                    |
| Study design                 | 4      | Present key elements of study design early in the paper                                                                                                                              | 3,4                |
| Setting                      | 5      | Describe the setting, locations, and relevant dates, including periods of recruitment, exposure, follow-up, and data collection                                                      | 4                  |
| Participants                 | 6      | (a) Give the eligibility criteria, and the sources and methods of selection of participants. Describe methods of follow-up                                                           | 4                  |
|                              |        | (b) For matched studies, give matching criteria and number of exposed and unexposed                                                                                                  |                    |
| Variables                    | 7      | Clearly define all outcomes, exposures, predictors, potential confounders, and effect modifiers. Give diagnostic criteria, if applicable                                             | 4                  |
| Data sources/<br>measurement | 8*     | For each variable of interest, give sources of data and details of methods of assessment (measurement). Describe comparability of assessment methods if there is more than one group | 4                  |
| Bias                         | 9      | Describe any efforts to address potential sources of bias                                                                                                                            | 4                  |
| Study size                   | 10     | Explain how the study size was arrived at                                                                                                                                            | 4                  |
| Quantitative variables       | 11     | Explain how quantitative variables were handled in the analyses. If applicable, describe which groupings were chosen and why                                                         | 4                  |
| Statistical methods          | 12     | (a) Describe all statistical methods, including those used to control for confounding                                                                                                | 4                  |
|                              |        | (b) Describe any methods used to examine subgroups and interactions                                                                                                                  |                    |
|                              |        | (c) Explain how missing data were addressed                                                                                                                                          |                    |
|                              |        | (d) If applicable, explain how loss to follow-up was addressed                                                                                                                       |                    |
|                              |        | (e) Describe any sensitivity analyses                                                                                                                                                |                    |
| <b>Results</b>               |        |                                                                                                                                                                                      |                    |

|                          |     |                                                                                                                                                                                                                                                                                                                                                                                                               |         |
|--------------------------|-----|---------------------------------------------------------------------------------------------------------------------------------------------------------------------------------------------------------------------------------------------------------------------------------------------------------------------------------------------------------------------------------------------------------------|---------|
| Participants             | 13* | (a) Report numbers of individuals at each stage of study—eg numbers potentially eligible, examined for eligibility, confirmed eligible, included in the study, completing follow-up, and analysed<br>(b) Give reasons for non-participation at each stage<br>(c) Consider use of a flow diagram                                                                                                               | 4       |
| Descriptive data         | 14* | (a) Give characteristics of study participants (eg demographic, clinical, social) and information on exposures and potential confounders<br>(b) Indicate number of participants with missing data for each variable of interest<br>(c) Summarise follow-up time (eg, average and total amount)                                                                                                                | 4       |
| Outcome data             | 15* | Report numbers of outcome events or summary measures over time                                                                                                                                                                                                                                                                                                                                                | 5       |
| Main results             | 16  | (a) Give unadjusted estimates and, if applicable, confounder-adjusted estimates and their precision (eg, 95% confidence interval). Make clear which confounders were adjusted for and why they were included<br>(b) Report category boundaries when continuous variables were categorized<br>(c) If relevant, consider translating estimates of relative risk into absolute risk for a meaningful time period | 5       |
| Other analyses           | 17  | Report other analyses done—eg analyses of subgroups and interactions, and sensitivity analyses                                                                                                                                                                                                                                                                                                                |         |
| <b>Discussion</b>        |     |                                                                                                                                                                                                                                                                                                                                                                                                               |         |
| Key results              | 18  | Summarise key results with reference to study objectives                                                                                                                                                                                                                                                                                                                                                      | 6, 7, 8 |
| <b>Limitations</b>       |     |                                                                                                                                                                                                                                                                                                                                                                                                               |         |
| Interpretation           | 20  | Give a cautious overall interpretation of results considering objectives, limitations, multiplicity of analyses, results from similar studies, and other relevant evidence                                                                                                                                                                                                                                    | 6, 7, 8 |
| Generalisability         | 21  | Discuss the generalisability (external validity) of the study results                                                                                                                                                                                                                                                                                                                                         | 8, 9    |
| <b>Other information</b> |     |                                                                                                                                                                                                                                                                                                                                                                                                               |         |
| Funding                  | 22  | Give the source of funding and the role of the funders for the present study and, if applicable, for the original study on which the present article is based                                                                                                                                                                                                                                                 | 9       |

\*Give information separately for cases and controls in case-control studies and, if applicable, for exposed and unexposed groups in cohort and cross-sectional studies.

**Note:** An Explanation and Elaboration article discusses each checklist item and gives methodological background and published examples of transparent reporting. The STROBE checklist is best used in conjunction with this article (freely available on the Web sites of PLoS Medicine at <http://www.plosmedicine.org/>, Annals of Internal Medicine at <http://www.annals.org/>, and Epidemiology at <http://www.epidem.com/>). Information on the STROBE Initiative is available at [www.strobe-statement.org](http://www.strobe-statement.org).

# BMJ Open

## Comparative cervical profiles of adult and under-18 front row rugby players: implications for playing policy.

|                                 |                                                                                                                                                                                                                                                                                                                                   |
|---------------------------------|-----------------------------------------------------------------------------------------------------------------------------------------------------------------------------------------------------------------------------------------------------------------------------------------------------------------------------------|
| Journal:                        | <i>BMJ Open</i>                                                                                                                                                                                                                                                                                                                   |
| Manuscript ID:                  | bmjopen-2014-004975.R2                                                                                                                                                                                                                                                                                                            |
| Article Type:                   | Research                                                                                                                                                                                                                                                                                                                          |
| Date Submitted by the Author:   | 09-Apr-2014                                                                                                                                                                                                                                                                                                                       |
| Complete List of Authors:       | Hamilton, David; University of Edinburgh, Orthopaedics<br>Gatherer, Don; Gatherer Limited,<br>Robson, James; Scottish Rugby Union,<br>Graham, Neil; Scottish Rugby Union,<br>Rennie, Nick; Scottish Rugby Union,<br>MacLean, James; Perth Royal Infirmary, Orthopaedics<br>Simpson, Hamish; University of Edinburgh, Orthopaedics |
| <b>Primary Subject Heading</b>: | Sports and exercise medicine                                                                                                                                                                                                                                                                                                      |
| Secondary Subject Heading:      | Health policy, Evidence based practice, Public health                                                                                                                                                                                                                                                                             |
| Keywords:                       | SPORTS MEDICINE, rugby, neck                                                                                                                                                                                                                                                                                                      |
|                                 |                                                                                                                                                                                                                                                                                                                                   |

SCHOLARONE™  
Manuscripts

1  
2  
3 **Comparative cervical profiles of adult and under-18 front row rugby players:**  
4 **implications for playing policy.**  
5  
6  
7

8 Hamilton DF<sup>1</sup>, Gatherer D<sup>2</sup>, Robson J<sup>3</sup>, Rennie N<sup>3</sup>, Graham N<sup>3</sup>, Maclean JGB<sup>4</sup>, Simpson  
9 AHRW<sup>1</sup>  
10

11  
12  
13 **Authors Institutions:**  
14

- 15 1. Department of Trauma and Orthopaedics, University of Edinburgh, Edinburgh, UK  
16 2. Gatherer Ltd, Aylesbury, UK  
17 3. Scottish Rugby Union, Edinburgh, UK  
18 4. Department of Orthopaedics, Perth Royal Infirmary, Perth, UK  
19  
20  
21

22 **Corresponding Author:**  
23

24 David Hamilton PhD  
25 Department of Trauma and Orthopaedics  
26 Chancellor's Building,  
27 49 Little France Crescent  
28 University of Edinburgh  
29 EH16 4SB  
30

31 E-mail: d.f.hamilton@ed.ac.uk  
32 tel: 0131 242 6297  
33 fax: 0131 242 6534  
34  
35

36 **KEY WORDS**  
37

38 Rugby; neck, injury, strength  
39  
40

41 **WORD COUNT**  
42

43 2665  
44  
45  
46  
47  
48  
49  
50  
51  
52  
53  
54  
55  
56  
57  
58  
59  
60

**ABSTRACT**

**Objectives:** To compare the cervical isometric strength, fatigue endurance and range of motion of adult and under-18 age grade front row rugby players to inform the development of a safe age group policy with particular reference to scrummaging.

**Design:** Cross-sectional cohort study.

**Setting:** 'Field testing' at Murrayfield stadium.

**Participants:** 30 high performance under-18 players and 21 adult front row rugby players

**Outcome measures:** Isometric neck strength, height, weight and grip strength.

**Results:** Youth players demonstrated the same height and grip strength as the adult players; however the adults were significantly heavier and demonstrated substantially greater isometric strength ( $p < 0.001$ ). Only 2 of the 'elite' younger players could match the adult mean cervical isometric strength value. In contrast to school age players in general, grip strength was poorly associated with neck strength ( $r=0.2$ ) in front row players; instead player weight ( $r=0.4$ ) and the number of years' experience of playing in the front row ( $r=0.5$ ) were the only relevant factor in multivariate modelling of cervical strength ( $R^2=0.3$ ).

**Conclusions:** Extreme forces are generated between opposing front rows in the scrum and avoidance of mismatch is important if the risk of injury is to be minimised. Although elite youth front row rugby players demonstrate the same peripheral strength as their adult counterparts on grip testing, the adults demonstrate significantly greater cervical strength. If older youths and adults are to play together, such findings have to be noted in the development of age group policies with particular reference to the scrum.

## ARTICLE SUMMARY

### Key Findings

Front row rugby players under the age of 18 cannot resist the same cervical loads as adult front row players.

In contrast to general findings on youth players, predictive modelling of cervical strength by proxy measures in this specific group is poor and direct testing is required.

This is directly relevant to age related playing policy for under-18s competing in the front row in the adult game as appropriate neck strength is likely to be important in preventing scrum collapse and the associated injuries.

Age related playing policy should reflect both generic and position specific physical ability

### Strengths and Limitations

A particular strength of this study is the direct physical cervical testing of representative player cohorts, and the novel data presented.

A limitation is the assumed though unsubstantiated link between cervical strength and injury; though this is mitigated in this specific context through the known link between scrum collapse and cervical injury.

## INTRODUCTION

Rugby Union (henceforth Rugby) is the world's most popular contact, or more appropriately collision sport, and carries an injury risk four times greater than semi-contact sports such as football/soccer.[1] The scrum is an iconic and fundamental part of the game, where two 'forward packs' compete for the ball to restart the game following a minor infringement. It is a test of strength and technique where the cervical spine of the opposing front rows are subjected to huge compressive and shear forces of a sufficient magnitude to result in tissue injury and structural failure[2].

Around 8% of all injuries in professional rugby are thought to result from the scrum[3, 4]. Injury events in amateur and youth rugby are thought to be similarly proportioned [5]. Though 8% represents a comparatively small proportion of the injury burden, these injuries are likely to be of greater severity and involve the spine.[6] Despite a typical match consisting of comparatively few scrums (compared to other contact events, such as tackles), around 40% of all rugby derived acute spinal cord injuries occur in the scrum.[7, 8] Scrum engagement occurs as the head and shoulders of the competing front rows make forceful contact. The force generated in the scrum engagement is thought to be a particular risk factor for injury, through high compressive and shear loads or hyperflexion of the cervical spine.[7-9] This risk has been somewhat mitigated in recent years by the introduction of 'controlled scrum engagement' where the distance between opposing front rows has been standardised in an attempt to reduce acceleration and thus collision forces.[10, 11] Scrum collapse has also been identified as a leading cause of scrum related injury.[7, 12] Premature micro trauma induced degeneration of the cervical spine in front row players[13] and mismatches in size between front row players[7, 14] have been suggested as potential factors for the over-representation of scrum-related injuries, though Brown et al.[8] note that coaching and technical factors have not been well explored in these analyses.

Body size and physical mismatch are considered (at least in part) to be associated with injury risk in schoolboy rugby.[15] Some national governing bodies have introduced a weight category banding for youth rugby to address this concern in children who mature skeletally at differing rates. However, once players reach the age of 18 all participants are considered as adults and no such segregation takes place, and the banding rule no longer applies. Indeed rugby is a sport that relies on differing physical attributes for the various playing positions. There are circumstances though where those yet to reach their 18<sup>th</sup> birthday may wish to play adult rugby, either through selection processes in the case of particularly gifted players, or through leaving school and joining a club playing in the adult leagues. Policy within Scottish Rugby (prior to the start of the 2013-2014 season) had been that only 'exceptional' 17 year-old players were eligible to play in the adult leagues, however, there was concern as to the suitability of this policy regarding the front row.

Though adequate cervical strength is relevant to all rugby players, the scrum exposes players' cervical spines to potentially injurious forces that must be attenuated by controlled spinal motion through the cervical musculature, ligaments and inter-vertebral discs.[16] Appropriate strength of the cervical musculature is thus particularly important for front row players. The risk of scrum collapse (and by extension associated injuries) is increased if any of the 6 front row players cannot maintain the muscular force required to complete the scrum. The overall compressive and shear forces generated in the scrum are only now being defined. These have been demonstrated to vary by playing level, with youth teams generating significantly lower forces than adult sides[2]. However the relationship between these overall scrum forces and the mechanisms by which the individual front row players modulate them has not been explored. We have previously demonstrated large variation in the neck strength of school-aged rugby players,[17] however we are not aware of any report of data on maximal strength or fatigue endurance specific to the front row forwards (either youth or adult). Characterisation of the strength profiles of the cervical spine of this specific group is thus warranted.

1  
2  
3  
4 The aim of this study was to assess the cervical isometric strength and fatigue endurance of  
5 both adult and senior school-aged rugby players to assess the ability of under-18 players to  
6 compete with adults in the front row of the scrum. A secondary objective was to assess the  
7 relationship between isometric strength, and various physical parameters (such as age, weight  
8 and grip strength) previously shown to predict this.  
9

## 10 11 **METHODS**

### 12 13 **Study design and sample**

14 A cross-sectional cohort study was undertaken to investigate the isometric neck strength and  
15 fatigue endurance of front row rugby players. Thirty senior school-aged players (under-18  
16 age-grade) were assessed at Murrayfield stadium in tandem with a Scottish Rugby Union  
17 (SRU) arranged front row coaching session, and 22 adult players in a separate assessment,  
18 again at Murrayfield stadium, organised in conjunction with the SRU.  
19

20 The youth players were drawn from 21 different clubs/schools from across Scotland and  
21 represented the 'elite' end of the senior school-aged front row players in Scotland. The adults  
22 were a representative sample of amateur players, drawn from 6 clubs reflecting the top 5  
23 playing levels in Scottish club rugby (as defined by the position of their first XV in the  
24 Scottish national leagues). This range was decided upon to reflect the spectrum of levels that  
25 the under-18 group may play. Players were assessed from Dunfermline, Heriots, Murrayfield  
26 Wanderers, Musselburgh, Royal High Corstorphine, and Watsonian rugby clubs, comprising  
27 players from 1<sup>st</sup>, 2<sup>nd</sup> and 3<sup>rd</sup> teams. Both adult and school-age testing sessions took place at the  
28 same facility in the same environment using the same equipment and operators. Participation  
29 was voluntary and signed consent was obtained from all participants. Regional Ethics  
30 Committee approval was received for this study.  
31

### 32 33 **Cervical strength and endurance assessment**

34 Isometric cervical muscle testing is well validated.[18-20] We assessed maximal voluntary  
35 isometric cervical muscle strength with the GS Gatherer and GS Analysis Suite (Gatherer  
36 Systems Ltd, Aylesbury); a custom-built device based on a 300Kg load cell and bespoke  
37 software system.  
38

39 The test was performed employing a previously reported protocol[17, 21] where the head was  
40 placed in the neutral anatomic position and subjected to manual controlled incremental  
41 loading to positional failure (the point of head movement). Subject report of pain or  
42 neurological symptoms also stopped the test. Loading was applied and data were recorded at  
43 20Hz. Peak isometric force generated by the musculature was defined as the maximal load  
44 recorded during the test procedure. An average of 3 tests is reported, with a 60 second rest  
45 period enforced between assessments.  
46

47 An assessment of cervical musculature fatigue endurance was made using the same test  
48 equipment. The player was required to exert an isometric extension load at 50% of their  
49 recorded mean peak extension force for as long as possible. The player sat in a neutral  
50 position with their arms by their side and head connected to the load cell. Players received  
51 visual graphical feedback as to the target load applied via a computer monitor. This allowed  
52 for maintenance of a consistent load until failure. A single assessment was made of fatigue.  
53

### 54 55 **Anthropometric parameters**

56 Additional measures were made of; height (Leicester Height Measure; SECA, UK), weight  
57 (medical grade mechanical flat scales; SECA, UK), grip strength (JAMAR hydraulic hand  
58 dynamometer; Sammons Preston, Illinois, USA) and cervical range of motion (Cervical  
59 Range of Motion Instrument, Performance Attainment Associates, Minnesota, USA). Three  
60



1  
2  
3 readings were obtained for each parameter and their average was derived and reported. Prior  
4 to the physical assessment, the player's rugby playing history and detail of neck specific  
5 training and injuries were determined using a self-reported questionnaire.  
6

### 7 **Data analysis**

8 Data were analysed using Minitab (Version 16). Data were checked for normality and are  
9 reported as means with standard deviation or 95% confidence intervals of the mean as a  
10 measure of dispersion. Independent samples t-tests were used to assess differences in  
11 continuous variables between groups unless otherwise stated. Significance was accepted as  $p$   
12  $< 0.05$  incorporating the Benjami-Hochberg correction for the testing of multiple hypotheses,  
13 to reduce the possibility of making a type I error in the interpretation of results.[22, 23]  
14

15 To assess the secondary research question as to predictive modelling of front row player neck  
16 strength all data was considered as a single cohort. Pearson correlation coefficients are  
17 reported for bivariate correlations. Stepwise regression modelling was performed to achieve  
18 the most predictive model for global neck strength (for which we use isometric extension)  
19 utilising the fewest variables. Predictive variables were selected if their bivariate significance  
20 was  $p < 0.1$  to accommodate the possibility of variables achieving statistical significance once  
21 the confounding influence of additional variables was controlled. A potential limitation of this  
22 approach is that the homogenised under-18 group may cause a clustering effect in the data.  
23 Separate analysis of the adult data demonstrates the same relationships as reported for the  
24 entire cohort lending credibility to the results presented. Further, all players assessed are  
25 eligible to play in the adult leagues and can thus be considered representative of a single  
26 cohort in the context of our secondary research question; to assess the influence of various  
27 physical variables (previously suggested to reflect the variation in cervical strength in a  
28 school aged population) in the specific situation of the front row player.  
29

### 30 **RESULTS**

31  
32 Large differences were observed between groups in terms of age and experience (years)  
33 playing as a front row forward. There was no difference in height or grip strength between the  
34 groups, though the adults were significantly heavier. Cervical range of motion was similar in  
35 measures of extension and rotation, though the elite under-18 group had a greater range of  
36 cervical flexion and side flexion (table 1).  
37

38 Differences were observed in isometric strength between groups in extension (figure 1, table  
39 2) and side flexion (table 2); the under 18 group approximately 20% weaker than the adult  
40 group. A larger variation was seen in all parameters of adult neck strength data compared to  
41 the under 18 group. This may be due to the selection bias of elite players in the younger age  
42 group, which may have somewhat homogenised this data. Despite this potential positive skew  
43 in the under-18 data, only 2 of the 30 elite under-18 front row players achieved the adult  
44 mean strength value (figure 1).  
45

46 Only 3 of the under-18s achieved the adult mean isometric extension fatigue endurance  
47 (impulse, table 2), this difference between groups was significant at  $p < 0.1$ , possibly  
48 reflecting the large variation in adult scores. The adults performed better in the fatigue  
49 assessment, holding significantly higher average loads for the same length of time as the  
50 younger players (table 2). Surprisingly, only a quarter of all players reported performing  
51 routine neck exercises; split evenly between groups (table 1).  
52

53 Predictive modelling;

54 Isometric neck strength was most associated with the experience of playing in the front row  
55 ( $r=0.5$ ,  $p<0.001$ ) (Figure 2), followed by weight ( $r=0.4$ ,  $p=0.004$ ) and player age ( $r=0.4$ ,  
56  $p=0.005$ ). In contrast, grip strength correlated relatively poorly ( $r=0.2$ ,  $p=0.09$ ) (figure 3).  
57 Cervical fatigue endurance was associated with peak isometric extension strength but  
58  
59  
60

1  
2  
3 correlated poorly ( $r=0.30$ ,  $p=0.08$ ). Player weight ( $r=0.6$ ,  $p=0.007$ ) was the factor most  
4 associated with fatigue, again grip strength correlated poorly ( $r=0.1$ ,  $p=0.6$ ).  
5

6 Stepwise regression determined the best predictive model for isometric strength to include  
7 the number of years' experience playing in the front row and the players' weight (table 3).  
8 The greatest single contributing variable was the experience of playing in the front row,  
9 which explained around 22% of the variation in isometric extension. The same variables also  
10 created the best predictive model of fatigue endurance, again explaining around a third of the  
11 variation in neck strength ( $R^2=0.4$ ).  
12

## 13 14 DISCUSSION

15  
16 This study demonstrates that even elite under-18 front row rugby players, who have  
17 participated in a conditioning and strengthening programme, are able to generate significantly  
18 less cervical muscle force than adult players. This is relevant when determining the  
19 suitability of junior players to compete in the adult game, where significant forces are exerted  
20 through the cervical spine of the front row forwards during the scrum. These forces must be  
21 modulated by the cervical musculature, and the reduced isometric strength and fatigue  
22 endurance ratings found in the under-18 players puts them at a significant disadvantage, with  
23 potentially injurious consequences. The under 18 players in this study were the top front row  
24 players in Scotland, and this sample of players are most likely to be considered appropriate to  
25 play in the adult leagues as they may seem physically stronger and bigger. Based on this, it  
26 may then be speculated that the difference in neck strength between the general under 18  
27 playing population and adults may be even greater.  
28

29  
30 Little information is available as to the 'neck strength' of rugby players, either adult or  
31 school-aged. We previously assessed the cervical isometric strength of Scottish school  
32 children between the ages of 13 and 18 and found huge variation both within and between  
33 year groups.[17] We are not aware of any other comparable data for adult players or of any  
34 study specifically investigating the cervical isometric strength of the front row forwards.  
35 Using multivariate techniques, we previously reported that player age, weight and grip  
36 strength (as an objective measure of overall strength) was strongly predictive of isometric  
37 neck extension strength in the general school-aged rugby playing population; explaining  
38 around two thirds of the variance in cervical strength. Interestingly in this analysis, the  
39 measure of grip strength was not a strong predictor of cervical strength in this specific group  
40 of front-row players, where player weight and number of years of experience of playing in the  
41 front row were the most important factors. This finding may be a reflection of the general lack  
42 of neck specific training performed among rugby players. Only 12 of the 64 players reported  
43 to have performed any neck specific exercises. This may suggest that the cervical strength of  
44 the players in this study were developed from either generic strength training or from specific  
45 scrum training. We propose that the elite under-18 players had reached the same global  
46 strength as their adult counterparts through peripheral strength training; however in the  
47 absence of specific structured conditioning, they could not match the cervical strength the  
48 adults had gained as a result of years of competitive scrummaging.  
49

50 This is to our knowledge the first report of a cervical musculature fatigue endurance  
51 assessment in front row rugby players of any age. In the absence of previous data, it was  
52 necessary to set a safe threshold at which to perform the test, thus the 50% sub-maximal value  
53 was selected to determine reference values for adult and under-18 front row players. While  
54 large differences were observed in fatigue endurance values achieved between adult and  
55 under-18 players, the large spread of the data in the adult cohort diluted the significance of  
56 this finding. Though all players achieved a similar time on fatigue assessment, the 50% sub-  
57 maximal load held by the under-18 group (20kg equivalent) was significantly less than the  
58 adult 50% load (25kg equivalent), as a result of their lower peak forces on the maximal  
59  
60

1  
2  
3 isometric testing. Now that these benchmark data are available, we recommend that future  
4 fatigue endurance assessment of under-18 players should be performed using the mean adult  
5 50% sub-maximal value (25Kg equivalent), which would represent around 60% of the  
6 average under-18 maximal isometric value found in this study. It is likely that greater  
7 differences would be apparent between adults and under-18 groups had we been able to  
8 employ this testing design, and further help discern those able to compete in the adult front  
9 row. Future work should also look at assessing 'scrum-specific' fatigue endurance; looking  
10 perhaps at repeated bouts of 80% sub-maximal testing over 10-15 seconds which could be  
11 argued to better reflect the demands of this activity. We suggest this as an area for future  
12 research.

13  
14 Preatoni et al.[2] assessed the forces generated in the scrum by 34 forward packs at 6 different  
15 playing grades (from senior-school to international level) and found notable differences in the  
16 forces generated between schools and senior sides. Worryingly, these authors further reported  
17 that the combined compression and shear forces they recorded in the scrums were of a  
18 sufficient magnitude to induce chronic spine injury. Though further information is needed to  
19 understand the link between mechanical forces in the scrum and injury, the shear forces  
20 recorded are of particular concern as a risk factor for chronic degeneration of the spine  
21 through undesirable rotation and bending motions. The differences in strength characteristics  
22 between adult and under-18 players we describe here suggests that appropriate and specific  
23 training interventions (perhaps through scrum training) are critical in developing the ability  
24 to modulate these forces at an individual level.

25  
26 Perhaps of greater concern is the closed kinetic chain situation of the scrum; where the head is  
27 constrained from moving and loads are applied at both ends. This can lead to a buckling  
28 motion; a process particularly evident in front row forwards when the scrum collapses and the  
29 head strikes the ground. If any single front row player has comparatively weak cervical  
30 extensors, it is reasonable to suggest that this may enhance the risk of scrum collapse. We  
31 suggest that specific training may influence this, thus younger players and perhaps also those  
32 returning from cervical injury are potentially at a competitive disadvantage. For the safety of  
33 all six front row players, it is important to recognize, understand and mitigate the  
34 biomechanical issues that occur in a closed kinetic chain situation where the forces cannot be  
35 vectored away from the spine.

36  
37 A limitation of this study is the speculative link between cervical strength and scrum collapse  
38 and thus injury risk. Although the focus of our investigation was to consider cervical strength  
39 parameters, various other factors such as the speed and direction of force application and  
40 orientation of the head/neck complex are likely to also have a bearing on the ability to  
41 modulate scrum forces. The neutral anatomic position was chosen for strength and fatigue  
42 testing from a safety point of view due to the lack of published data to determine alternative  
43 test design. The validity of this test position as the optimal assessment profile for rugby  
44 cervical testing is unknown. Future work should focus on the influence of head position as to  
45 strength and fatigue values in this context. It must also be recognised that recent changes to  
46 the laws of the game surrounding scrum engagement, depowering the contact forces at the  
47 onset of the scrum and promoting a sustained pushing contest may influence the playing  
48 requirements of the cervical spine of the front rows. It may be that endurance parameters are  
49 now more critical than absolute strength characteristics, though further work is required to  
50 elaborate on any influence to beneficial physical characteristics as a result of this technical  
51 change.

52  
53 In the elite under-18 group assessed, only 2 of 30 players recorded the mean cervical  
54 isometric strength of the adult cohort. Although a few individuals may possess the physical  
55 characteristics (and technical skill) to compete with adult players, our results suggest that  
56 policy should prevent players under the age of 18 playing in the front row of an adult match,  
57 unless specific criteria is met. In contrast to the general schoolboy population, predictive  
58  
59  
60

1  
2  
3 modelling of cervical strength using alternative physical characteristics were poor. As such,  
4 specific testing would need to be employed to identify those few individuals able to match  
5 their adult counterparts in terms of cervical strength. The concept of a passport to play in the  
6 front row is well established in some countries as a means of ensuring players are  
7 appropriately equipped to cope with the rigours of scrummaging. Objective measures of the  
8 individuals' cervical strength profile should be an integral part of any selection process for  
9 players wishing to play in the front row.  
10

## 11 **ACKNOWLEDGEMENTS**

12  
13  
14 We wish to extend thanks to the staff of the Scottish Rugby Union, Prof Jimmy Hutchison  
15 and Mr Richard Nutton who facilitated this work, and to all the players who took part in the  
16 assessments.  
17

## 18 **AUTHOR CONTRIBUTIONS**

19  
20  
21 All authors listed were involved in the study design and data acquisition. DH performed the  
22 analysis and drafted the manuscript. All authors revised and approved the submission.  
23  
24

## 25 **FUNDING STATEMENT**

26  
27 This research received no specific grant from any funding agency in the public, commercial  
28 or not-for-profit sectors'.  
29  
30

## 31 **CONFLICT OF INTEREST**

32  
33 DG has shares in Gatherer Systems who manufacture and supplied the testing equipment used  
34 in this study. The other authors declare no conflict of interest.  
35  
36

## 37 **DATA SHARING STATEMENT**

38  
39 The data are held in a secure database at the University of Edinburgh. Any party wishing to  
40 access unpublished data should discuss with the corresponding author in the first instance.  
41  
42  
43  
44  
45  
46  
47  
48  
49  
50  
51  
52  
53  
54  
55  
56  
57  
58  
59  
60

## REFERENCES

- [1]. Palmer-Green DS, Stokes KA, Fuller CW, et al. Match injuries in English youth academy and schools rugby union: an epidemiological study. *Am J Sports Med.* 2013;41:749-55.
- [2]. Preatoni E, Stokes KA, England ME, et al. The influence of playing level on the biomechanical demands experienced by rugby union forwards during machine scrummaging. *Scand J Med Sci Sports* 2013;23:178-184
- [3]. Brooks JHM, Fuller CW, Kemp SPT, et al. Epidemiology of injuries in English Professional rugby union: part 1 match injuries. *Br J Sports Med* 2005;39:757-766
- [4]. Brooks JHM, Fuller CW, Kemp SPT, et al. Epidemiology of injuries in English Professional rugby union: part 2 training injuries. *Br J Sports Med* 2005;39:767-775
- [5]. McIntosh AS, McCrory P, Finch CF, et al. Head, face and neck injury in youth rugby: incidence and risk factors. *Br J Sports Med* 2010;44:188-193.
- [6]. MacLean JG, Hutchison JD. Serious neck injuries in U19 rugby union players: an audit of admissions to spinal injury units in Great Britain and Ireland. *Br J Sports Med* 2012;46:591-4.
- [7]. Quarrie KL, Cantu RC, Chalmers DJ. Rugby union injuries to the cervical spine and spinal cord. *Sports Med* 2002;32:633-53
- [8]. Brown JC, Lambert MI, Verhagen E, et al. The incidence of rugby-related catastrophic injuries (including cardiac events) in South Africa from 2008 to 2011: a cohort study. *BMJ open* 2013;3:e002475
- [9]. Brooks JHM, Kemp SPT. Injury-prevention priorities according to playing position in professional rugby union players *Br J Sports Med* 2011;45:765-775.
- [10]. Gianotti S, Hume PA, Hopkins WG, et al. Interim evaluation of the effect of a new scrum law on neck and back injuries in rugby union. *Br J Sports Med* 2013;42:427-430
- [11]. Fuller CW, Brooks JH, Kemp SP. Spinal injuries in professional rugby union: a prospective cohort study. *Clin J Sport Med.* 2007;17:10-6
- [12] Roberts SP, Trewartha G, England M, et al. Collapsed scrums and collision tackles: what is the injury risk? *Br J Sports Med* [e-pub ahead of print]
- [13]. Scher AT. Rugby injuries to the cervical spine and spinal cord: a 10-year review. *Clin Sports Med.* 1998;17:195-206
- [14]. Viljoen W, Patricios J. BokSmart - implementing a National Rugby Safety Programme. *Br J Sports Med.* 2012;46:692-3
- [15]. Nutton RW, Hamilton DF, Hutchison JD, et al. Variation in physical development in schoolboy rugby players: can maturity testing reduce mismatch? *BMJ Open.* 2012;2:e001149
- [16]. Torg J, Ramsey-Emrhein J. Suggested management guidelines for participation in collision activities with congenital, developmental, or post injury lesions involving the cervical spine. *Med Sci Sports Exerc.* 1997;29(7):256-272.

1  
2  
3 [17]. Hamilton DF, Gatherer D, Jenkins PJ, et al. Age-related differences in the neck strength  
4 of adolescent rugby players: A cross-sectional cohort study of Scottish schoolchildren. *Bone*  
5 *Joint Res* 2012;1:152–7.  
6

7 [18]. Garge's GL, Medina D, Milutinovic L, et al. Normative database of isometric cervical  
8 strength in a healthy population. *Med Sci Sports Exerc* 2002;33:464-70.  
9

10 [19]. Jordan A, Mehlsen J, Bullow PM, et al. Maximal isometric strength of the cervical  
11 musculature in 100 healthy volunteers. *Spine* 1999;24:1343-8.  
12

13 [20]. Chiu TT, Sing KL. Evaluation of cervical range of motion and isometric neck muscle  
14 strength: reliability and validity. *Clin Rehabil* 2002;16:851-8.  
15

16 [21]. Peek K, Gatherer D. The rehabilitation of a professional rugby union player following a  
17 C7/T1 posterior microdiscectomy. *Phys Ther Sport* 2005;6:195–200.  
18

19 [22]. Benjamini Y, and Hochberg Y. Controlling the false discovery rate: a practical and  
20 powerful approach to multiple testing. *J. R. Statist. Soc. B* 1995;57, 289–300.  
21

22 [23]. Storey JD, "The positive false discovery rate: A Bayesian interpretation and the q-value"  
23 *Annals of Statistics* 2003;31: 2013–2035  
24  
25  
26  
27  
28  
29  
30  
31  
32  
33  
34  
35  
36  
37  
38  
39  
40  
41  
42  
43  
44  
45  
46  
47  
48  
49  
50  
51  
52  
53  
54  
55  
56  
57  
58  
59  
60

## TABLES

**Table 1- Anthropometric data by group**

|                                     | Under 18     | Adult         | Significance        |
|-------------------------------------|--------------|---------------|---------------------|
| Age (years)                         | 16.7 (16-17) | 27.2 (19-50)  | <0.001 <sup>‡</sup> |
| Experience of the front row (years) | 5.0 (1-12)   | 14.3 (2-26)   | <0.001 <sup>‡</sup> |
| Regular neck strengthening (yes/no) | 7/23         | 5/21          | 0.959 <sup>*</sup>  |
| Height (cm)                         | 178.7 (5.54) | 178.7 (5.91)  | 0.960               |
| Weight (kg)                         | 96.0 (13.69) | 107.8 (13.67) | 0.004 <sup>‡</sup>  |
| Grip strength (kg)                  | 47.8 (5.31)  | 49.56 (7.56)  | 0.360               |
| Cervical Range of Motion (degrees)  |              |               |                     |
| Extension                           | 65.33 (8.70) | 65.62 (6.62)  | 0.895               |
| Flexion                             | 58.50 (8.32) | 44.10 (8.93)  | <0001 <sup>‡</sup>  |
| Side flexion (left)                 | 49.17 (5.88) | 44.33 (6.51)  | 0.010 <sup>‡</sup>  |
| Side flexion (right)                | 45.60 (8.93) | 41.33 (6.18)  | 0.049               |
| Rotation (left)                     | 66.50 (7.67) | 65.90 (6.80)  | 0.772               |
| Rotation (right)                    | 67.83 (8.06) | 64.76 (6.83)  | 0.149               |

Age and experience reported as mean (range), all other variables as mean (SD); <sup>‡</sup> Remains significant at the 0.05 level correcting for multiple testing; <sup>\*</sup>Chi Square

**Table 2 - Cervical strength assessment by group**

|                         | Under 18             | Adult                | Significance        |
|-------------------------|----------------------|----------------------|---------------------|
| Isometric Strength (kg) |                      |                      |                     |
| Extension               | 41.70 (39.36, 44.18) | 53.70 (48.42, 58.99) | <0.001 <sup>‡</sup> |
| Flexion                 | 22.59 (20.45, 24.72) | 25.40 (22.94, 27.86) | 0.098               |
| Side flexion (left)     | 32.24 (30.04, 34.45) | 40.53 (36.36, 44.71) | 0.002 <sup>‡</sup>  |
| Side flexion (right)    | 31.83 (29.66, 24.01) | 42.48 (39.24, 45.73) | <0.001 <sup>‡</sup> |
| Fatigue                 |                      |                      |                     |
| Total (kg.sec)          | 1305 (1181, 1429)    | 1551 (1332, 1770)    | 0.058               |
| Time achieved (sec)     | 67.10 (60.44, 83.17) | 71.81 (62.96, 71.28) | 0.390               |
| Average load (kg)       | 18.25 (16.77, 19.73) | 23.54 (21.35, 25.73) | <0.001 <sup>‡</sup> |

All data reported as mean (95% CI). <sup>‡</sup> Remains significant at the 0.05 level correcting for multiple testing

**Table 3 – Multivariate predictive modelling of isometric neck extension (R<sup>2</sup>=0.31)**

| Predictor | Co-efficient | P value |
|-----------|--------------|---------|
|-----------|--------------|---------|

---

|                      |      |       |
|----------------------|------|-------|
| Front row experience | 0.63 | 0.035 |
| Weight               | 0.22 | 0.003 |

---

Front row experience is the primary predictor variable explaining 22% of the total variation, adding weight as a predictor determines the best fit model (displayed above). Other variations offer less than 1% additional enhanced explanatory power with the limitation of comprising more predictor variables and were thus discounted.

For peer review only



1  
2  
3 **FIGURE LEGEND**  
4

5  
6 **Figure 1 - Differences in cervical strength by group**  
7

8  
9 **Figure 2 – Strong relationship between cervical strength and playing experience**  
10

11  
12 **Figure 3 – Weak relationship between grip strength and cervical strength**  
13  
14  
15  
16  
17  
18  
19  
20  
21  
22  
23  
24  
25  
26  
27  
28  
29  
30  
31  
32  
33  
34  
35  
36  
37  
38  
39  
40  
41  
42  
43  
44  
45  
46  
47  
48  
49  
50  
51  
52  
53  
54  
55  
56  
57  
58  
59  
60

1  
2  
3 **Comparative cervical profiles of adult and under-18 front row rugby players:**  
4 **implications for playing policy.**  
5  
6  
7

8 Hamilton DF<sup>1</sup>, Gatherer D<sup>2</sup>, Robson J<sup>3</sup>, Rennie N<sup>3</sup>, Graham N<sup>3</sup>, Maclean JGB<sup>4</sup>, Simpson  
9 AHRW<sup>1</sup>  
10

11  
12  
13 **Authors Institutions:**  
14

- 15 1. Department of Trauma and Orthopaedics, University of Edinburgh, Edinburgh, UK  
16 2. Gatherer Ltd, Aylesbury, UK  
17 3. Scottish Rugby Union, Edinburgh, UK  
18 4. Department of Orthopaedics, Perth Royal Infirmary, Perth, UK  
19  
20  
21

22 **Corresponding Author:**  
23

24 David Hamilton PhD  
25 Department of Trauma and Orthopaedics  
26 Chancellor's Building,  
27 49 Little France Crescent  
28 University of Edinburgh  
29 EH16 4SB  
30

31 E-mail: d.f.hamilton@ed.ac.uk  
32 tel: 0131 242 6297  
33 fax: 0131 242 6534  
34  
35

36 **KEY WORDS**  
37

38 Rugby; neck, injury, strength  
39  
40

41 **WORD COUNT**  
42

43 2665  
44  
45  
46  
47  
48  
49  
50  
51  
52  
53  
54  
55  
56  
57  
58  
59  
60

**ABSTRACT**

**Objectives:** To compare the cervical isometric strength, fatigue endurance and range of motion of adult and under-18 age grade front row rugby players to inform the development of a safe age group policy with particular reference to scrummaging.

**Design:** Cross-sectional cohort study.

**Setting:** 'Field testing' at Murrayfield stadium.

**Participants:** 30 high performance under-18 players and 21 adult front row rugby players

**Outcome measures:** Isometric neck strength, height, weight and grip strength.

**Results:** Youth players demonstrated the same height and grip strength as the adult players; however the adults were significantly heavier and demonstrated substantially greater isometric strength ( $p < 0.001$ ). Only 2 of the 'elite' younger players could match the adult mean cervical isometric strength value. In contrast to school age players in general, grip strength was poorly associated with neck strength ( $r=0.2$ ) in front row players; instead player weight ( $r=0.4$ ) and the number of years' experience of playing in the front row ( $r=0.5$ ) were the only relevant factor in multivariate modelling of cervical strength ( $R^2=0.3$ ).

**Conclusions:** Extreme forces are generated between opposing front rows in the scrum and avoidance of mismatch is important if the risk of injury is to be minimised. Although elite youth front row rugby players demonstrate the same peripheral strength as their adult counterparts on grip testing, the adults demonstrate significantly greater cervical strength. If older youths and adults are to play together, such findings have to be noted in the development of age group policies with particular reference to the scrum.

## ARTICLE SUMMARY

### Key Findings

Front row rugby players under the age of 18 cannot resist the same cervical loads as adult front row players.

In contrast to general findings on youth players, predictive modelling of cervical strength by proxy measures in this specific group is poor and direct testing is required.

This is directly relevant to age related playing policy for under-18s competing in the front row in the adult game as appropriate neck strength is ~~paramount important into~~ likely to be paramount important into preventing scrum collapse and the associated injuries.

Age related playing policy should reflect both generic and position specific physical ability

### Strengths and Limitations

A particular strength of this study is the direct physical cervical testing of representative player cohorts, and the novel data presented.

A limitation is the assumed though unsubstantiated link between cervical strength and injury; though this is mitigated in this specific context through the known link between scrum collapse and cervical injury.

## INTRODUCTION

Rugby [Union \(henceforth Rugby\)](#) is the world's most popular contact, or more appropriately collision, sport, and carries an injury risk four times greater than semi-contact sports such as football/soccer.[1] The scrum is an iconic and fundamental part of the game, where two 'forward packs' compete for the ball to restart the game following a minor infringement. It is a test of strength and technique where the cervical spine of the opposing front rows are subjected to huge compressive and shear forces of a sufficient magnitude to result in tissue injury[2] and structural failure[2].

Around 8% of all injuries in professional rugby are thought to result from the scrum,[3, 4], and ~~Injury events~~ in amateur and youth rugby are thought to be similarly proportioned [5]. ~~Though 8% represents a comparatively this number is comparatively small proportion of the injury burden,~~ these injuries are likely to be of greater severity and involve the spine.[56] Despite a typical match consisting of comparatively few scrums (compared to other contact events, such as tackles), around 40% of all rugby derived acute spinal cord injuries occur in the scrum.[6, 7, 8] Scrum engagement occurs as the head and shoulders of the competing front rows make forceful contact. ~~The force generated in the scrum engagement~~ is thought to be a particular risk factor for injury, through high compressive and shear loads or hyperflexion of the cervical spine.[6-8,9] This risk has been somewhat mitigated in recent years by the introduction of 'controlled scrum engagement' where the distance between opposing front rows has been standardised in an attempt to reduce acceleration and thus collision forces.[9, 10, 11] ~~Collapsing of the scrum~~ Scrum collapse has also been identified as a leading cause of scrum related injury.[6, 12] Premature micro trauma induced degeneration of the cervical spine in front row players[12,13] and mismatches in size between front row players[6, 13,14] have been suggested as potential factors for the over-representation of scrum-related injuries, though Brown et al.[78] note that coaching and technical factors have not been well explored in these analyses.

Body size and physical mismatch are considered (at least in part) to be associated ~~to~~ with injury risk in schoolboy rugby.[14,15] Some national governing bodies have introduced a weight category banding for youth rugby to address this concern in children who mature skeletally at differing rates. However, once players reach the age of 18 all participants are considered as adults and no such segregation takes place, ~~and the banding rule no longer applies.~~ Indeed rugby is a sport that relies on differing physical attributes for the various playing positions. There are circumstances though where those yet to reach their 18<sup>th</sup> birthday may wish to play adult rugby, either through selection processes in the case of particularly gifted players, or through leaving school and joining a club playing in the adult leagues. Policy within Scottish Rugby (prior to the start of the 2013-2014 season) had been that only 'exceptional' 17 year-old players were eligible to play in the adult leagues, however, there was concern as to the suitability of this policy regarding the front row.

~~Though adequate cervical strength is relevant to all rugby players,~~ the scrum exposes player's cervical spines to potentially injurious forces that must be attenuated by controlled spinal motion through the cervical musculature, ligaments and inter-vertebral discs.[15,16] Appropriate strength of the cervical musculature is thus particularly important for front row players. ~~The risk of scrum collapse (and by extension associated injuries) is increased if any of the 6 front row players cannot maintain the muscular force required to complete the scrum. The overall compressive and shear forces generated in the scrum are only now being defined. These have been demonstrated to vary by playing level, with youth teams generating significantly lower forces than adult sides[2]. However the relationship between these overall scrum forces and the mechanisms by which the individual front row players modulate them has not been explored.~~ We have previously demonstrated large variation in the neck strength of school-aged rugby players,[16,17] however we are not aware of any report of data on maximal strength or fatigue endurance specific to the front row forwards (either youth or

adult).~~Characterisation of the strength profiles of the cervical spine of this specific group is thus warranted.~~

The aim of this study was to assess the cervical isometric strength and fatigue endurance of both adult and senior school-aged rugby players to assess the ability of under-18 players to compete with adults in the front row of the scrum. A secondary objective was to assess the relationship between isometric strength, and various ~~other~~ physical parameters (such as age, weight and grip strength)s previously shown to predict this.

## METHODS

### Study design and ~~population~~sample

A cross-sectional cohort study was undertaken to investigate the isometric neck strength and fatigue endurance of front row rugby players. ~~Thirty~~<sup>30</sup> senior school-aged players (under-18 age-grade) were assessed at Murrayfield stadium in tandem with aa-Scottish Rugby Union (SRU) arranged front row coaching session~~training day~~, and 22 adult players in a separate assessment, again at Murrayfield stadium, organised in conjunction with the SRU.

The youth players were drawn from 21 different clubs/schools from across Scotland and represented the 'elite' end of the senior school-aged front row players in Scotland. The adults were a representative sample of amateur players, drawn from 6 clubs reflecting the top 5 playing levels in Scottish club rugby (as defined by the position of their first XV in the Scottish national leagues). This range was decided upon to reflect the spectrum of levels that the under-18 group may play. Players were assessed from Dunfermline, Heriots, Murrayfield Wanderers, Musselburgh, Royal High Corstorphine, and Watsonian rugby clubs, comprising players from 1<sup>st</sup>, 2<sup>nd</sup> and 3<sup>rd</sup> teams. Both adult and school-age testing sessions took place at the same facility in Murrayfield stadium in the same environment using the same equipment and operators. Participation was voluntary and signed consent was obtained from all participants. Regional Ethics Committee approval was received for this study.

### Cervical strength and endurance assessment

Isometric cervical muscle testing is well validated.~~[176-198]~~<sup>[18-20]</sup> We assessed maximal voluntary isometric cervical muscle strength with the GS Gatherer and GS Analysis Suite (Gatherer Systems Ltd, Aylesbury); a custom-built device based on a 300Kg load cell and bespoke software system.

The test was performed employing a previously reported protocol~~[165-17, 20]~~<sup>[19-21]</sup> where the head was placed in the neutral anatomic position and subjected to manual controlled incremental loading to positional failure (the point of head movement). Subject report of pain or neurological symptoms also stopped the test. Loading was applied and data ~~were~~<sup>was</sup> recorded at 20Hz. Peak isometric force generated by the musculature was defined as the maximal load recorded during the test procedure. An average of 3 tests is reported, with a-60 second rest period enforced between assessments.

An assessment of cervical musculature fatigue endurance was made using the same test equipment. The player was required to exert an isometric extension load at 50% of their recorded mean peak extension force for as long as possible. The player sat in a neutral position with their arms by their side and head connected to the load cell. Players received visual graphical feedback as to the target load applied via a computer monitor. This allowed for maintenance of a consistent load until failure. A single assessment was made of fatigue.

### Anthropometric parameters

Additional measures were made of; height (Leicester Height Measure; SECA, UK), weight (medical grade mechanical flat scales; SECA, UK), grip strength (JAMAR hydraulic hand

dynamometer; Sammons Preston, Illinois, USA) and cervical range of motion (Cervical Range of Motion Instrument, Performance Attainment Associates, Minnesota, USA). ~~3-Three~~ readings were obtained for each parameter and their average was derived and reported. ~~Prior to the physical assessment, the player's rugby playing history and detail of neck specific training and injuries were determined using a self-reported questionnaire. Demographic data and a self-report questionnaire to determine the individual's rugby playing history and details of neck specific training and injuries were completed by the participants prior to physical assessment.~~

### Data analysis

Data were analysed using Minitab (Version 16). Data were checked for normality and are reported as means with standard deviation ~~or 95% confidence intervals of the mean~~ as a measure of dispersion. Independent samples t-tests were used to assess differences in continuous variables between groups unless otherwise stated. Significance was accepted as  $p < 0.05$  incorporating the Benjami-Hochberg correction for the testing of multiple hypotheses, to reduce the possibility of making a type II error in the interpretation of results. [~~210, 221, 22, 23~~]

~~To assess the secondary research question as to predictive modelling of front row player neck strength all data was considered as a single cohort. Pearson correlation coefficients are reported for bivariate correlations. Pearson correlation coefficients are reported for bivariate correlations. Multivariate s~~Stepwise regression modelling was performed to achieve the most predictive model ~~for global neck strength (for which we use isometric extension)~~ utilising the fewest variables. Predictive variables were selected ~~with aif their bivariate~~ significance ~~was of~~  $p < 0.1$  to accommodate the possibility of variables achieving statistical significance once the confounding influence of additional variables was controlled. ~~A potential limitation of this approach is that the homogenised under-18 group may cause a clustering effect in the data. Separate analysis of the adult data demonstrates the same relationships as reported for the entire cohort lending credibility to the results presented. Further, all players assessed are eligible to play in the adult leagues and can thus be considered representative of a single cohort in the context of our secondary research question; to assess the influence of various physical variables (previously suggested to reflect the variation in cervical strength in a school aged population) in the specific situation of the front row player.~~

## RESULTS

~~As expected, l~~Large differences were observed between groups in terms of age and experience (years) playing as a front row forward. There was no difference in height or grip strength between the groups, though the adults were significantly heavier. Cervical range of motion was similar in measures of extension and rotation, though the elite under-18 group had a greater range of cervical flexion and ~~rotation-side flexion~~ (table 1).

~~Substantial d~~Differences were observed in isometric strength between groups in extension (figure 1, table 2) and side flexion (table 2); ~~the under 18 group approximately 20% weaker than the adult group.~~ A larger variation was seen in all parameters of adult neck strength data compared to the under 18 group. This may be due to the selection bias of elite players in the younger age group, which may have somewhat homogenised this data. Despite this potential positive skew in the under-18 data, only 2 of the 30 elite under-18 front row players achieved the adult mean strength value (figure ~~12~~).

Only 3 of the under-18s achieved the adult mean isometric extension fatigue endurance (~~total work impulse, figure 1~~table 2), this difference between groups was significant at  $p < 0.1$ , possibly reflecting the large variation in adult scores. The adults performed better in the fatigue assessment, holding significantly higher average loads for the same length of time as

the younger players (table 2). Surprisingly, only a quarter of all players reported performing routine neck exercises; split evenly between groups (table 1).

#### Predictive modelling:

Isometric neck strength was most associated with the experience of playing in the front row ( $r=0.5$ ,  $p<0.001$ ) (Figure 2), followed by weight ( $r=0.4$ ,  $p=0.004$ ) and player age ( $r=0.4$ ,  $p=0.005$ ). In contrast, grip strength correlated relatively poorly ( $r=0.2$ ,  $p=0.09$ ) (figure 3). Cervical fatigue endurance was associated with peak isometric extension strength but correlated poorly ( $r=0.30$ ,  $p=0.08$ ). Player weight ( $r=0.6$ ,  $p=0.007$ ) was the factor most associated with fatigue, again grip strength correlated poorly ( $r=0.1$ ,  $p=0.6$ ).

Multivariate Stepwise regression found determined the best predictive model for isometric strength to include the number of years' experience playing in the front row and the players' weight (table 3). The greatest single contributing variable was the experience of playing in the front row, which explained around 22% of the variation in isometric extension. The same variables also created the best predictive model of fatigue endurance, again explaining around a third of the variation in neck strength ( $R^2=0.4$ ).

## DISCUSSION

This study demonstrates that even elite under-18 front row rugby players, who have participated in a conditioning and strengthening programme, are able to generate significantly less cervical muscle force than ~~their~~ adult ~~player~~ equivalents. This is highly relevant ~~when~~ determining the suitability of ~~junior~~ players to compete in the adult game, where significant forces are exerted through the cervical spine of the front row forwards during the scrum. These forces must be modulated by the cervical musculature, and the reduced isometric strength and fatigue endurance ratings found in the under-18 players puts them at a significant disadvantage, with potentially injurious consequences. The under 18 players in this study were the top front row players in Scotland, and this sample of players are most likely to be considered appropriate to play in the adult leagues as they may seem physically stronger and bigger. Based on this, it may then be speculated that the difference in neck strength between the general under 18 playing population and adults may be even greater. A particular concern is that the under-18 players evaluated in this study contained a selection bias of high performance age-grade players. While this group represents the players most likely to be considered appropriate to play in the adult leagues, it is also likely that they are bigger and stronger than their age-grade counterparts, suggesting that the actual difference between the adult and under-18 values in the wider population may be much greater.

Little information is available as to the 'neck strength' of rugby players, either adult or school-aged. We previously assessed the cervical isometric strength of Scottish school children between the ages of 13 and 18 and found huge variation both within and between year groups.<sup>[16,17]</sup> We are not aware of any other comparable data for adult players or of any study specifically investigating the cervical isometric strength of the front row forwards. Using multivariate techniques, we previously reported that player age, weight and grip strength (as an objective measure of overall strength) was strongly predictive of isometric neck extension strength in the general school-aged rugby playing population; explaining around two thirds of the variance in cervical strength. Interestingly in this analysis, the measure of grip strength was not a strong predictor of cervical strength in this specific group of front-row players, where player weight and number of years of experience of playing in the front row were the most important factors. This finding may be a reflection of the general lack of neck specific training performed among rugby players. Only 12 of the 64 players reported to have performed any neck specific exercises. This may suggest that the cervical strength of the players in this study were developed from either generic strength training or from specific scrum training. It is likely that for most people scrummaging is the main source of cervical



1  
2  
3 ~~strength training and this is supported by the finding that only a quarter of the players~~  
4 ~~assessed reported performing regular exercises for the neck.~~ We propose that the elite under-  
5 18 players had reached the same global strength as their adult counterparts through peripheral  
6 strength training; however in the absence of specific structured conditioning, they could not  
7 match the cervical strength the adults had gained as a result of years of competitive  
8 scrummaging.  
9

10 This is to our knowledge the first report of a cervical musculature fatigue endurance  
11 assessment in front row rugby players of any age. In the absence of previous data, it was  
12 necessary to set a safe threshold at which to perform the test, thus the 50% sub-maximal value  
13 was selected to determine reference values for adult and under-18 front row players. While  
14 large differences were observed in fatigue endurance values achieved between adult and  
15 under-18 players, the large spread of the data in the adult cohort diluted the significance of  
16 this finding. Though all players achieved a similar time on fatigue assessment, the 50% sub-  
17 maximal load held by the under-18 group (20kg equivalent) was significantly less than the  
18 adult 50% load (25kg equivalent), as a result of their lower peak forces on the maximal  
19 isometric testing. Now that these benchmark data are available, we recommend that future  
20 fatigue endurance assessment of under-18 players should be performed using the mean adult  
21 50% sub-maximal value (25Kg equivalent), which would represent around 60% of the  
22 average under-18 maximal isometric value found in this study. It is likely that greater  
23 differences would be apparent between adults and under-18 groups had we been able to  
24 employ this testing design, and further help discern those able to compete in the adult front  
25 row. Future work should also look at assessing 'scrum-specific' fatigue endurance; looking  
26 perhaps at repeated bouts of 80% sub-maximal testing over 10-15 seconds which [could be](#)  
27 [argued to better reflects](#) the demands of this activity. [We suggest this as an area for future](#)  
28 [research.](#)  
29

30 Preatoni et al.[2] assessed the forces generated in the scrum by 34 forward packs at 6 different  
31 playing grades (from senior-school to international level) and found notable differences in the  
32 forces generated between schools and senior sides. Worryingly, these authors further reported  
33 that the combined compression and shear forces they recorded in the scrums were of a  
34 sufficient magnitude to induce chronic spine injury. Though further information is needed to  
35 understand the link between mechanical forces in the scrum and injury, the shear forces  
36 recorded are of particular concern as a risk factor for chronic degeneration of the spine  
37 through undesirable rotation and bending motions. [The differences in strength characteristics](#)  
38 [between adult and under-18 players we describe here suggests that appropriate and specific](#)  
39 [training interventions \(perhaps through scrum training\) are critical in developing the ability](#)  
40 [modulate these forces at an individual level.](#)  
41

42 Perhaps of greater concern is the closed kinetic chain situation of the scrum; where the head is  
43 constrained from moving and loads are applied at both ends. This can lead to a buckling  
44 motion; a process particularly evident in front row forwards when the scrum collapses and the  
45 head strikes the ground. If any single front row player has [comparatively](#) weak cervical  
46 extensors, it is reasonable to suggest that this may enhance the risk of scrum collapse. [We](#)  
47 [suggest that specific training may influence this, thus younger players and perhaps also those](#)  
48 [returning from cervical injury are potentially at a competitive disadvantage.](#) For the safety of  
49 all six front row players, it is important to recognize, understand and mitigate the  
50 biomechanical issues that occur in a closed kinetic chain situation where the forces cannot be  
51 vectored away from the spine.  
52

53  
54 [A limitation of this study is the speculative link between cervical strength and scrum collapse](#)  
55 [and thus injury risk. Although the focus of our investigation was to consider cervical strength](#)  
56 [parameters, various other factors such as the speed and direction of force application and](#)  
57 [orientation of the head/neck complex are likely to also have a bearing on the ability to](#)  
58 [modulate scrum forces. The neutral anatomic position was chosen for strength and fatigue](#)  
59  
60

testing from a safety point of view due to the lack of published data to determine alternative test design. The validity of this test position as the optimal assessment profile for rugby cervical testing is unknown. Future work should focus on the influence of head position as to strength and fatigue values in this context. It must also be recognised that recent changes to the laws of the game surrounding scrum engagement, depowering the contact forces at the onset of the scrum and promoting a sustained pushing contest may influence the playing requirements of the cervical spine of the front rows. It may be that endurance parameters are now more critical than absolute strength characteristics, though further work is required to elaborate on any influence to beneficial physical characteristics as a result of this technical change.

In the elite under-18 group assessed, only 2 of 30 players recorded the mean cervical isometric strength of the adult cohort. Although a few individuals may possess the physical characteristics (and technical skill) to compete with adult players, our results suggest that policy should prevent players under the age of 18 playing in the front row of an adult match, unless specific criteria is met. In contrast to the general schoolboy population, predictive modelling of cervical strength using alternative physical characteristics ~~were~~ was poor. As such, specific testing would need to be employed to identify those few individuals able to match their adult counterparts in terms of cervical strength. The concept of a passport to play in the front row is well established in some countries as a means of ensuring players are appropriately equipped to cope with the rigours of scrummaging. Objective measures of the individuals' cervical strength profile should be an integral part of any selection process for players wishing to play in the front row.

#### **ACKNOWLEDGEMENTS**

We wish to extend thanks to the staff of the Scottish Rugby Union, Prof Jimmy Hutchison and Mr Richard Nutton who facilitated this work, and to all the players who took part in the assessments.

#### **AUTHOR CONTRIBUTIONS**

All authors listed were involved in the study design and data acquisition. DH performed the analysis and drafted the manuscript. All authors revised and approved the submission.

#### **FUNDING STATEMENT**

This research received no specific grant from any funding agency in the public, commercial or not-for-profit sectors'.

#### **CONFLICT OF INTEREST**

DG has shares in Gatherer Systems who manufacture and supplied the testing equipment used in this study. The other authors declare no conflict of interest.

#### **DATA SHARING STATEMENT**

The data are held in a secure database at the University of Edinburgh. Any party wishing to access unpublished data should discuss with the corresponding author in the first instance.

## REFERENCES

- [1]. Palmer-Green DS, Stokes KA, Fuller CW, et al. Match injuries in English youth academy and schools rugby union: an epidemiological study. *Am J Sports Med.* 2013;41:749-55.
- [2]. Preatoni E, Stokes KA, England ME, et al. The influence of playing level on the biomechanical demands experienced by rugby union forwards during machine scrummaging. *Scand J Med Sci Sports* 2013;23:178-184
- [3]. Brooks JHM, Fuller CW, Kemp SPT, et al. Epidemiology of injuries in English Professional rugby union: part 1 match injuries. *Br J Sports Med* 2005;39:757-766
- [4]. Brooks JHM, Fuller CW, Kemp SPT, et al. Epidemiology of injuries in English Professional rugby union: part 2 training injuries. *Br J Sports Med* 2005;39:767-775
- [5]. [McIntosh AS, McCrory P, Finch CF, Wolfe R. Head, face and neck injury in youth rugby: incidence and risk factors. \*Br J Sports Med\* 2010;44:188-193.](#)
- [56]. MacLean JG, Hutchison JD. Serious neck injuries in U19 rugby union players: an audit of admissions to spinal injury units in Great Britain and Ireland. *Br J Sports Med* 2012;46:591-4.
- [67]. Quarrie KL, Cantu RC, Chalmers DJ. Rugby union injuries to the cervical spine and spinal cord. *Sports Med* 2002;32:633-53
- [78]. Brown JC, Lambert MI, Verhagen E, et al. The incidence of rugby-related catastrophic injuries (including cardiac events) in South Africa from 2008 to 2011: a cohort study. *BMJ open* 2013;3:e002475
- [89]. Brooks JHM, Kemp SPT. Injury-prevention priorities according to playing position in professional rugby union players *Br J Sports Med* 2011;45:765-775.
- [910]. Gianotti S, Hume PA, Hopkins WG, et al. Interim evaluation of the effect of a new scrum law on neck and back injuries in rugby union. *Br J Sports Med* 2013;42:427-430
- [1011]. Fuller CW, Brooks JH, Kemp SP. Spinal injuries in professional rugby union: a prospective cohort study. *Clin J Sport Med.* 2007;17:10-6
- [112] [Roberts SP, Trewartha G, England M, et al. Collapsed scrums and collision tackles: what is the injury risk? \*Br J Sports Med\* \[e-pub ahead of print\]](#)
- [12+13]. Scher AT. Rugby injuries to the cervical spine and spinal cord: a 10-year review. *Clin Sports Med.* 1998;17:195-206
- [13+14]. Viljoen W, Patricios J. BokSmart - implementing a National Rugby Safety Programme. *Br J Sports Med.* 2012;46:692-3
- [143+15]. Nutton RW, Hamilton DF, Hutchison JD, et al. Variation in physical development in schoolboy rugby players: can maturity testing reduce mismatch? *BMJ Open.* 2012;2:e001149
- [154+16]. Torg J, Ramsey-Emrhein J. Suggested management guidelines for participation in collision activities with congenital, developmental, or post injury lesions involving the cervical spine. *Med Sci Sports Exerc.* 1997;29(7):256-272.

- 1  
2  
3 | [16517]. Hamilton DF, Gatherer D, Jenkins PJ, et al. Age-related differences in the neck  
4 strength of adolescent rugby players: A cross-sectional cohort study of Scottish  
5 schoolchildren. *Bone Joint Res* 2012;1:152–7.  
6  
7 | [17618]. Garg's GL, Medina D, Milutinovic L, et al. Normative database of isometric  
8 cervical strength in a healthy population. *Med Sci Sports Exerc* 2002;33:464-70.  
9  
10 | [18719]. Jordan A, Mehlsen J, Bu'low PM, et al. Maximal isometric strength of the cervical  
11 musculature in 100 healthy volunteers. *Spine* 1999;24:1343-8.  
12  
13 | [19820]. Chiu TT, Sing KL. Evaluation of cervical range of motion and isometric neck  
14 muscle strength: reliability and validity. *Clin Rehabil* 2002;16:851-8.  
15  
16 | [201921]. Peek K, Gatherer D. The rehabilitation of a professional rugby union player  
17 following a C7/T1 posterior microdiscectomy. *Phys Ther Sport* 2005;6:195–200.  
18  
19 | [21022]. Benjamini Y, and Hochberg Y. Controlling the false discovery rate: a practical and  
20 powerful approach to multiple testing. *J. R. Statist. Soc. B* 1995;57, 289–300.  
21  
22 | [22123]. Storey JD, "The positive false discovery rate: A Bayesian interpretation and the q-  
23 value" *Annals of Statistics* 2003;31: 2013–2035  
24  
25  
26  
27  
28  
29  
30  
31  
32  
33  
34  
35  
36  
37  
38  
39  
40  
41  
42  
43  
44  
45  
46  
47  
48  
49  
50  
51  
52  
53  
54  
55  
56  
57  
58  
59  
60

## TABLES

Table 1- Anthropometric data **by group**

|                                     | Under 18     | Adult         | Significance        |
|-------------------------------------|--------------|---------------|---------------------|
| Age (years)                         | 16.7 (16-17) | 27.2 (19-50)  | <0.001 <sup>‡</sup> |
| Experience of the front row (years) | 5.0 (1-12)   | 14.3 (2-26)   | <0.001 <sup>‡</sup> |
| Regular neck strengthening (yes/no) | 7/23         | 5/21          | 0.959 <sup>*</sup>  |
| Height (cm)                         | 178.7 (5.54) | 178.7 (5.91)  | 0.960               |
| Weight (kg)                         | 96.0 (13.69) | 107.8 (13.67) | 0.004 <sup>‡</sup>  |
| Grip strength (kg)                  | 47.8 (5.31)  | 49.56 (7.56)  | 0.360               |
| Cervical Range of Motion (degrees)  |              |               |                     |
| Extension                           | 65.33 (8.70) | 65.62 (6.62)  | 0.895               |
| Flexion                             | 58.50 (8.32) | 44.10 (8.93)  | <0001 <sup>‡</sup>  |
| Side flexion (left)                 | 49.17 (5.88) | 44.33 (6.51)  | 0.010 <sup>‡</sup>  |
| Side flexion (right)                | 45.60 (8.93) | 41.33 (6.18)  | 0.049               |
| Rotation (left)                     | 66.50 (7.67) | 65.90 (6.80)  | 0.772               |
| Rotation (right)                    | 67.83 (8.06) | 64.76 (6.83)  | 0.149               |

Age and experience reported as mean (range), all other variables as mean (SD); <sup>‡</sup> Remains significant at the 0.05 level correcting for multiple testing; <sup>\*</sup>Chi Square

Table 2 - Cervical strength assessment **by group**

|                         | Under 18                  | Adult                     | Significance        |
|-------------------------|---------------------------|---------------------------|---------------------|
| Isometric Strength (kg) |                           |                           |                     |
| Extension               | 41.70 (39.36, 44.186-74)  | 53.70 (48.42, 58.9942-36) | <0.001 <sup>‡</sup> |
| Flexion                 | 22.59 (20.45, 24.725-96)  | 25.40 (22.94, 27.865-76)  | 0.098               |
| Side flexion (left)     | 32.24 (30.04, 34.456-16)  | 40.53 (36.36, 44.719-76)  | 0.002 <sup>‡</sup>  |
| Side flexion (right)    | 31.83 (29.66, 24.016-08)  | 42.48 (39.24, 45.737-59)  | <0.001 <sup>‡</sup> |
| Fatigue                 |                           |                           |                     |
| Total (kg./sec)         | 1305 (1181, 1429236.8)    | 1551 (1332, 1770512)      | 0.058               |
| Time achieved (sec)     | 67.10 (60.44, 83.1721-67) | 71.81 (62.96, 71.289-73)  | 0.390               |
| Average load (kg)       | 18.25 (16.77, 19.732-82)  | 23.54 (21.35, 25.735-13)  | <0.001 <sup>‡</sup> |

All data reported as mean (95% CI/SD). <sup>‡</sup> Remains significant at the 0.05 level correcting for multiple testing

Table 3 – Multivariate predictive modelling of isometric neck extension (R<sup>2</sup>=0.31)

| Predictor | Co-efficient | P value |
|-----------|--------------|---------|
|-----------|--------------|---------|

1  
2  
3  
4  
5  
6  
7  
8  
9  
10  
11  
12  
13  
14  
15  
16  
17  
18  
19  
20  
21  
22  
23  
24  
25  
26  
27  
28  
29  
30  
31  
32  
33  
34  
35  
36  
37  
38  
39  
40  
41  
42  
43  
44  
45  
46  
47  
48  
49  
50  
51  
52  
53  
54  
55  
56  
57  
58  
59  
60

---

|                      |      |       |
|----------------------|------|-------|
| Front row experience | 0.63 | 0.035 |
| Weight               | 0.22 | 0.003 |

Front row experience is the primary predictor variable explaining 22% of the total variation, adding weight as a predictor determines the best fit model (displayed above). Other variations offer less than 1% additional enhanced explanatory power with the limitation of comprising more predictor variables and were thus discounted.

For peer review only

1  
2  
3 **FIGURE LEGEND**  
4

5  
6 **Figure 1 - Differences in cervical strength by group**  
7

8  
9 **Figure 2 – Strong relationship between cervical strength and playing experience**  
10

11  
12 **Figure 3 – Weak relationship between grip strength and cervical strength**  
13  
14  
15  
16  
17  
18  
19  
20  
21  
22  
23  
24  
25  
26  
27  
28  
29  
30  
31  
32  
33  
34  
35  
36  
37  
38  
39  
40  
41  
42  
43  
44  
45  
46  
47  
48  
49  
50  
51  
52  
53  
54  
55  
56  
57  
58  
59  
60

1  
2  
3  
4  
5  
6  
7  
8  
9  
10  
11  
12  
13  
14  
15  
16  
17  
18  
19  
20  
21  
22  
23  
24  
25  
26  
27  
28  
29  
30  
31  
32  
33  
34  
35  
36  
37  
38  
39  
40  
41  
42  
43  
44  
45  
46  
47  
48  
49  
50  
51  
52  
53  
54  
55  
56  
57  
58  
59  
60

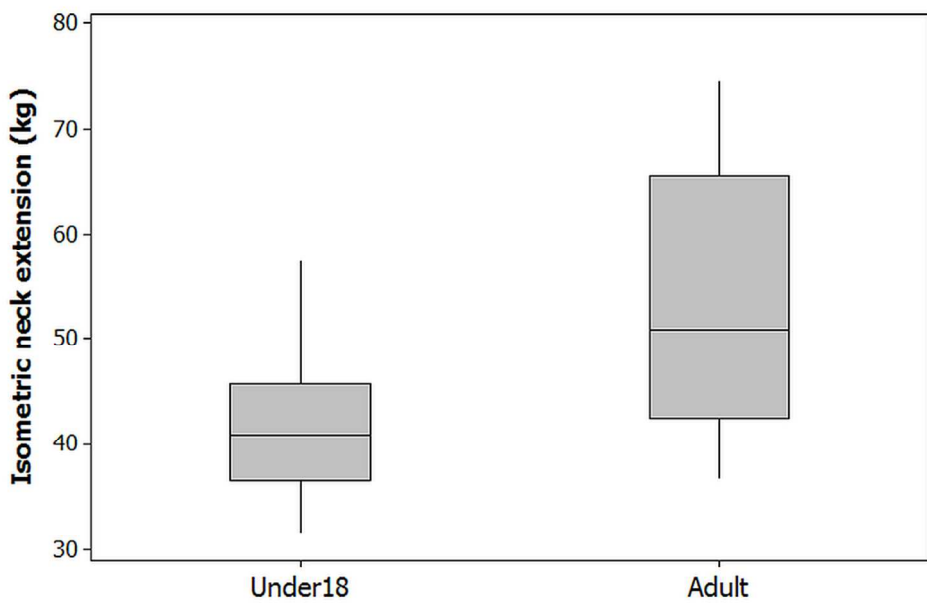

Differences in cervical isometric extension  
90x59mm (300 x 300 DPI)

Review only



1  
2  
3  
4  
5  
6  
7  
8  
9  
10  
11  
12  
13  
14  
15  
16  
17  
18  
19  
20  
21  
22  
23  
24  
25  
26  
27  
28  
29  
30  
31  
32  
33  
34  
35  
36  
37  
38  
39  
40  
41  
42  
43  
44  
45  
46  
47  
48  
49  
50  
51  
52  
53  
54  
55  
56  
57  
58  
59  
60

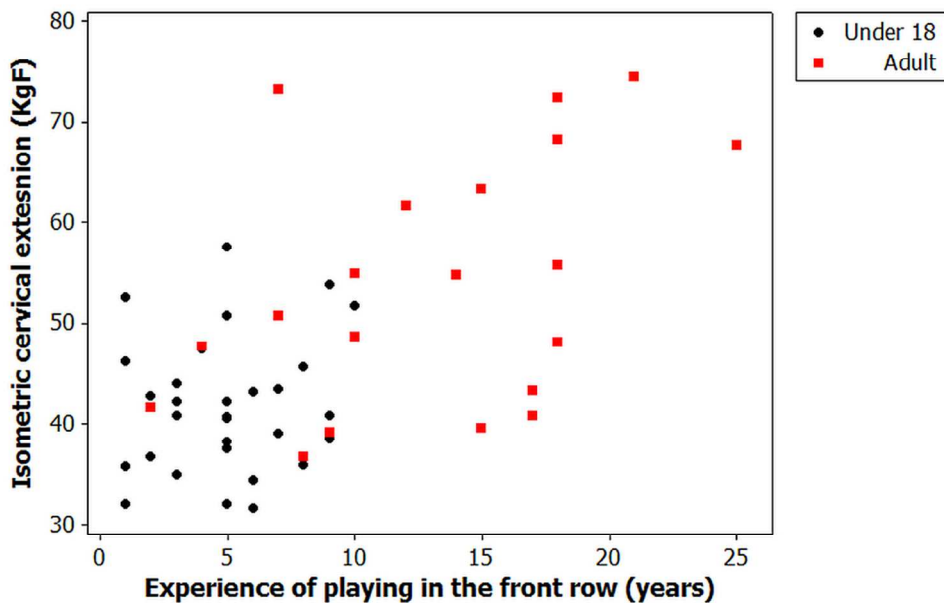

Strong relationship between cervical strength and playing experience  
90x60mm (300 x 300 DPI)

Review only

1  
2  
3  
4  
5  
6  
7  
8  
9  
10  
11  
12  
13  
14  
15  
16  
17  
18  
19  
20  
21  
22  
23  
24  
25  
26  
27  
28  
29  
30  
31  
32  
33  
34  
35  
36  
37  
38  
39  
40  
41  
42  
43  
44  
45  
46  
47  
48  
49  
50  
51  
52  
53  
54  
55  
56  
57  
58  
59  
60

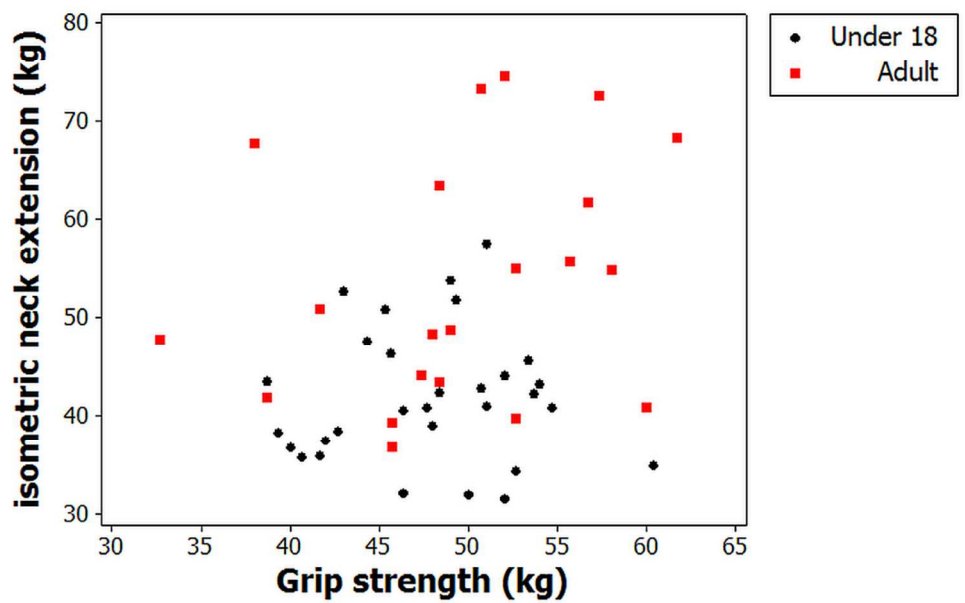

Weak relationship between grip strength and cervical strength  
90x59mm (300 x 300 DPI)

Review only

STROBE 2007 (v4) Statement—Checklist of items that should be included in reports of *cohort studies*

| Section/Topic                | Item # | Recommendation                                                                                                                                                                       | Reported on page # |
|------------------------------|--------|--------------------------------------------------------------------------------------------------------------------------------------------------------------------------------------|--------------------|
| Title and abstract           | 1      | (a) Indicate the study's design with a commonly used term in the title or the abstract                                                                                               | 2                  |
|                              |        | (b) Provide in the abstract an informative and balanced summary of what was done and what was found                                                                                  | 2                  |
| <b>Introduction</b>          |        |                                                                                                                                                                                      |                    |
| Background/rationale         | 2      | Explain the scientific background and rationale for the investigation being reported                                                                                                 | 3                  |
| Objectives                   | 3      | State specific objectives, including any prespecified hypotheses                                                                                                                     | 3                  |
| <b>Methods</b>               |        |                                                                                                                                                                                      |                    |
| Study design                 | 4      | Present key elements of study design early in the paper                                                                                                                              | 3,4                |
| Setting                      | 5      | Describe the setting, locations, and relevant dates, including periods of recruitment, exposure, follow-up, and data collection                                                      | 4                  |
| Participants                 | 6      | (a) Give the eligibility criteria, and the sources and methods of selection of participants. Describe methods of follow-up                                                           | 4                  |
|                              |        | (b) For matched studies, give matching criteria and number of exposed and unexposed                                                                                                  |                    |
| Variables                    | 7      | Clearly define all outcomes, exposures, predictors, potential confounders, and effect modifiers. Give diagnostic criteria, if applicable                                             | 4                  |
| Data sources/<br>measurement | 8*     | For each variable of interest, give sources of data and details of methods of assessment (measurement). Describe comparability of assessment methods if there is more than one group | 4                  |
| Bias                         | 9      | Describe any efforts to address potential sources of bias                                                                                                                            | 4                  |
| Study size                   | 10     | Explain how the study size was arrived at                                                                                                                                            | 4                  |
| Quantitative variables       | 11     | Explain how quantitative variables were handled in the analyses. If applicable, describe which groupings were chosen and why                                                         | 4                  |
| Statistical methods          | 12     | (a) Describe all statistical methods, including those used to control for confounding                                                                                                | 4                  |
|                              |        | (b) Describe any methods used to examine subgroups and interactions                                                                                                                  |                    |
|                              |        | (c) Explain how missing data were addressed                                                                                                                                          |                    |
|                              |        | (d) If applicable, explain how loss to follow-up was addressed                                                                                                                       |                    |
|                              |        | (e) Describe any sensitivity analyses                                                                                                                                                |                    |
| <b>Results</b>               |        |                                                                                                                                                                                      |                    |

|                          |     |                                                                                                                                                                                                                                                                                                                                                                                                               |         |
|--------------------------|-----|---------------------------------------------------------------------------------------------------------------------------------------------------------------------------------------------------------------------------------------------------------------------------------------------------------------------------------------------------------------------------------------------------------------|---------|
| Participants             | 13* | (a) Report numbers of individuals at each stage of study—eg numbers potentially eligible, examined for eligibility, confirmed eligible, included in the study, completing follow-up, and analysed<br>(b) Give reasons for non-participation at each stage<br>(c) Consider use of a flow diagram                                                                                                               | 4       |
| Descriptive data         | 14* | (a) Give characteristics of study participants (eg demographic, clinical, social) and information on exposures and potential confounders<br>(b) Indicate number of participants with missing data for each variable of interest<br>(c) Summarise follow-up time (eg, average and total amount)                                                                                                                | 4       |
| Outcome data             | 15* | Report numbers of outcome events or summary measures over time                                                                                                                                                                                                                                                                                                                                                | 5       |
| Main results             | 16  | (a) Give unadjusted estimates and, if applicable, confounder-adjusted estimates and their precision (eg, 95% confidence interval). Make clear which confounders were adjusted for and why they were included<br>(b) Report category boundaries when continuous variables were categorized<br>(c) If relevant, consider translating estimates of relative risk into absolute risk for a meaningful time period | 5       |
| Other analyses           | 17  | Report other analyses done—eg analyses of subgroups and interactions, and sensitivity analyses                                                                                                                                                                                                                                                                                                                |         |
| <b>Discussion</b>        |     |                                                                                                                                                                                                                                                                                                                                                                                                               |         |
| Key results              | 18  | Summarise key results with reference to study objectives                                                                                                                                                                                                                                                                                                                                                      | 6, 7, 8 |
| <b>Limitations</b>       |     |                                                                                                                                                                                                                                                                                                                                                                                                               |         |
| Interpretation           | 20  | Give a cautious overall interpretation of results considering objectives, limitations, multiplicity of analyses, results from similar studies, and other relevant evidence                                                                                                                                                                                                                                    | 6, 7, 8 |
| Generalisability         | 21  | Discuss the generalisability (external validity) of the study results                                                                                                                                                                                                                                                                                                                                         | 8, 9    |
| <b>Other information</b> |     |                                                                                                                                                                                                                                                                                                                                                                                                               |         |
| Funding                  | 22  | Give the source of funding and the role of the funders for the present study and, if applicable, for the original study on which the present article is based                                                                                                                                                                                                                                                 | 9       |

\*Give information separately for cases and controls in case-control studies and, if applicable, for exposed and unexposed groups in cohort and cross-sectional studies.

**Note:** An Explanation and Elaboration article discusses each checklist item and gives methodological background and published examples of transparent reporting. The STROBE checklist is best used in conjunction with this article (freely available on the Web sites of PLoS Medicine at <http://www.plosmedicine.org/>, Annals of Internal Medicine at <http://www.annals.org/>, and Epidemiology at <http://www.epidem.com/>). Information on the STROBE Initiative is available at [www.strobe-statement.org](http://www.strobe-statement.org).
